# Supplementary material for: Characterization of the horse chestnut genome reveals the evolution of aescin and aesculin biosynthesis
Source: PubMed Central journal article supplement (PMC10576086; doi:10.1038/s41467-023-42253-y), 2023-10-13
Supplement: 41467_2023_42253_MOESM1_ESM.pdf [file 41467_2023_42253_MOESM1_ESM.pdf]

**Characterization of the horse chestnut genome reveals the evolution of  
aescin and aesculin biosynthesis**

Sun *et al.*

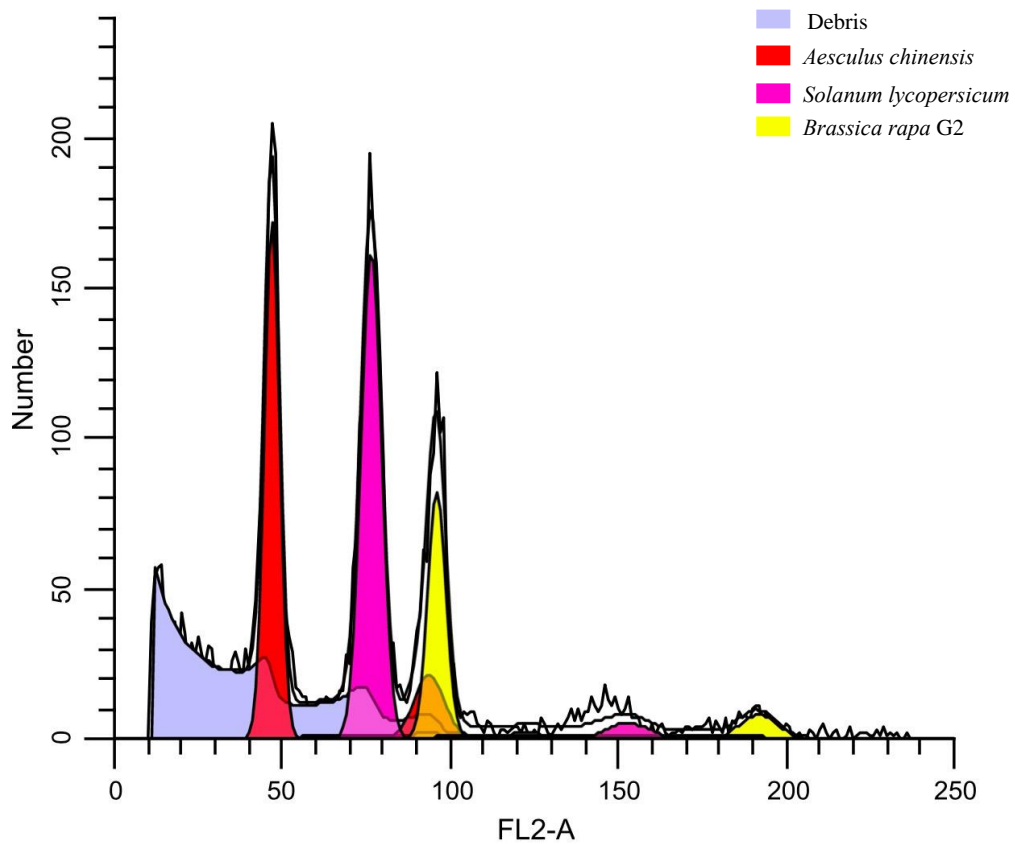

**Supplementary Figure 1. Flow cytometry is used to estimate the genome size of *A. chinensis* using *Solanum lycopersicum* (900 Mb) and *Brassica rapa* (485 Mb) as the standards.** The yellow peak at FL2-A value of 47.10 for *Brassica rapa* was covered by the peak of *A. chinensis* (46.82). The genome size was estimated as 481.9 Mb. Source data are provided as a Source Data file.

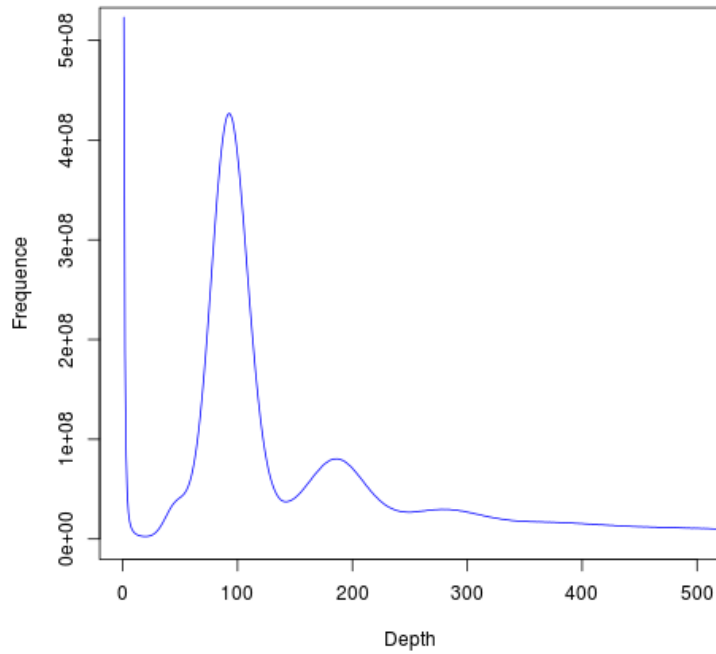

**Supplementary Figure 2. The genome size of *A. chinensis* estimated by 17 *k*-mer.** We totally identified 47,364,609,904 *K*-mers and the peak depth of *K*-mer is 92. The genome size of *A. chinensis* was calculated as 514.83 Mb, and the revised genome size is 504.38 Mb.

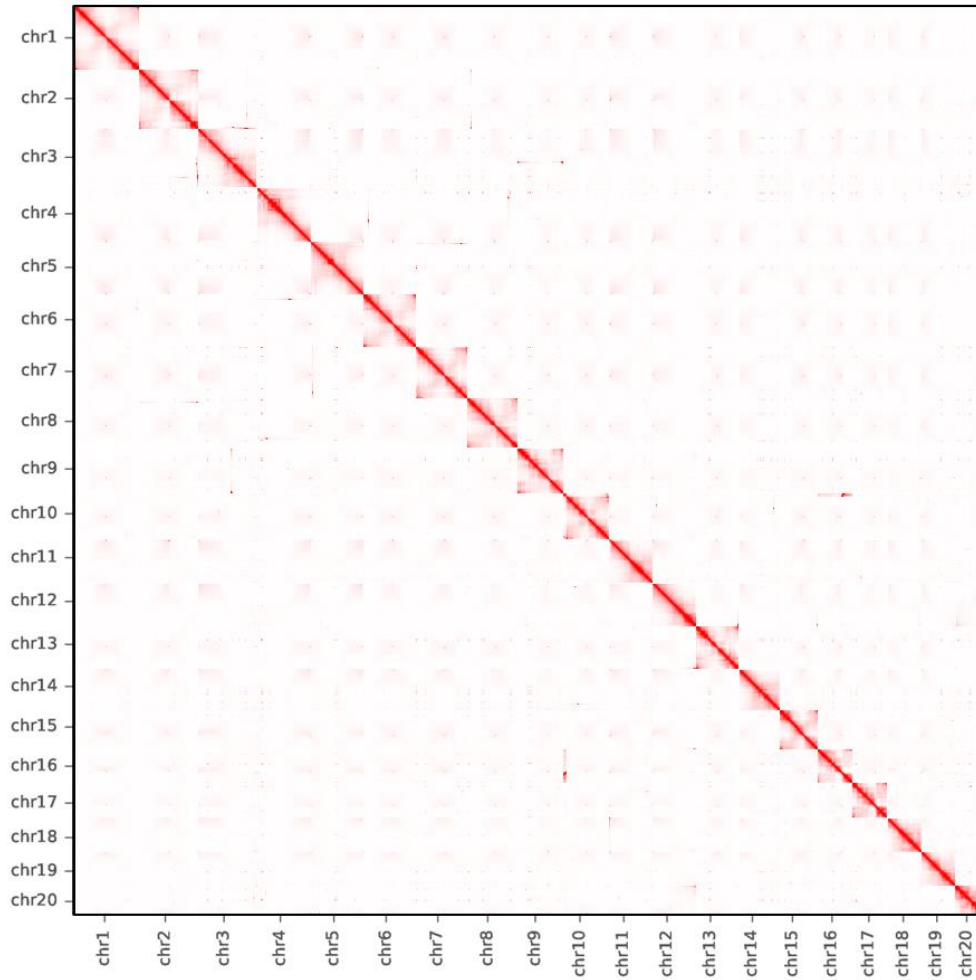

**Supplementary Figure 3. Heatmap of *A. chinensis* chromosome conformation capture analysis.**

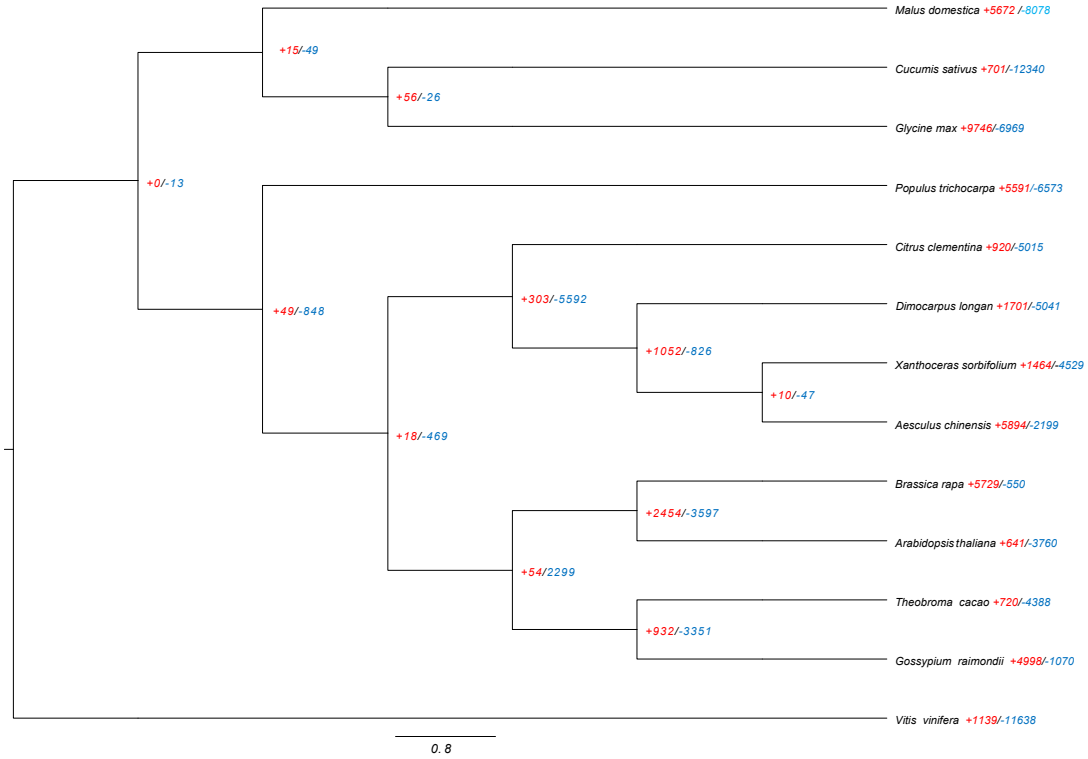

**Supplementary Figure 4. The orthologous genes and phylogenetic analysis among *A. chinensis* and other 12 angiosperms.** The red and blue numbers present the expansion and contraction of gene families among 13 angiosperms respectively.

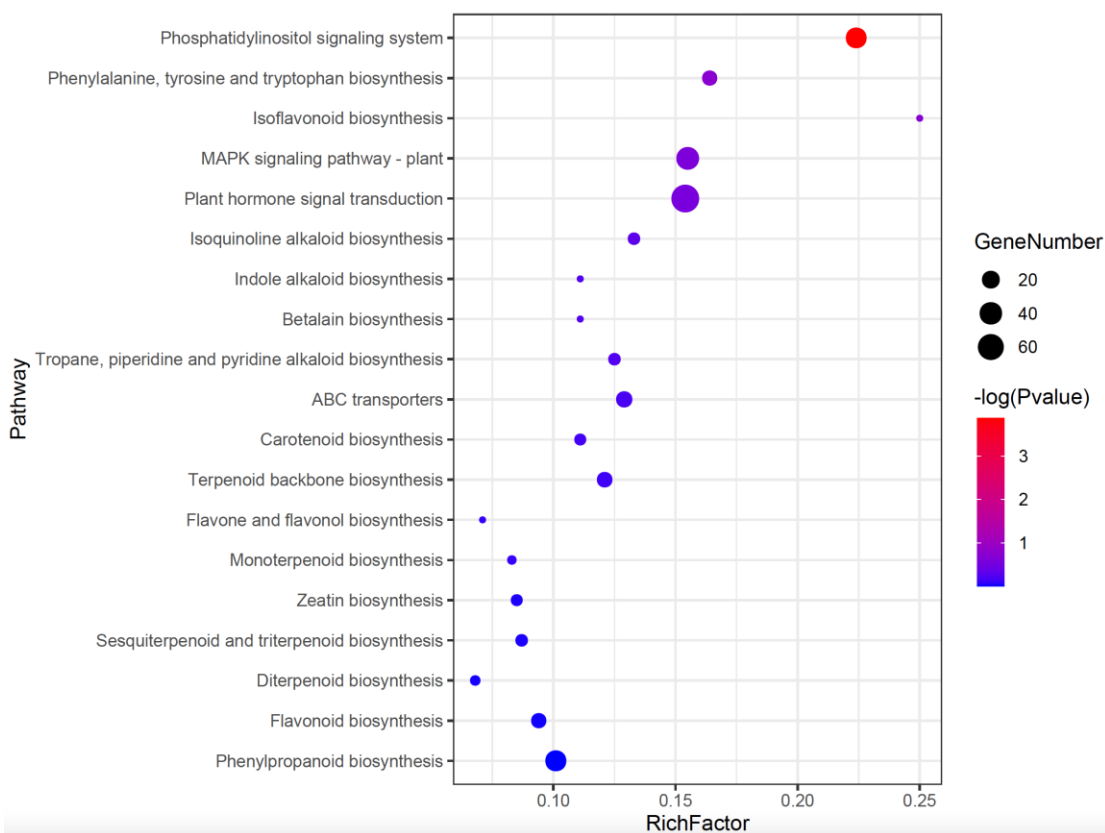

**Supplementary Figure 5. KEGG pathway enrichment analysis for the expanded gene families in *A. chinensis* genome.** The size of each circle means the amounts of genes. The different color of each circle means the  $P$ -value. RichFactor means the number of genes in the enriched KEGG pathway divided by the number of background genes. Source data are provided as a Source Data file.

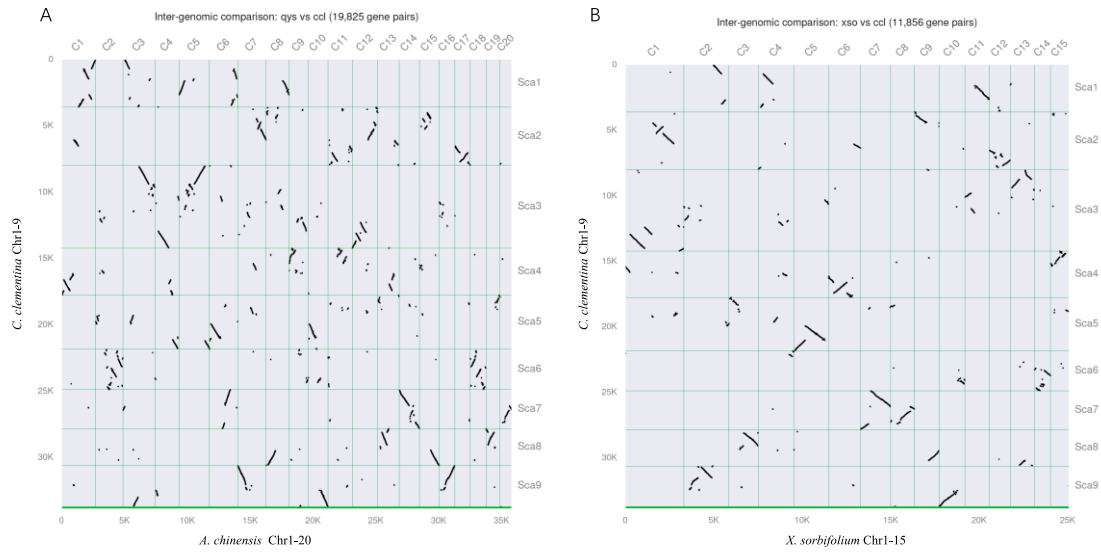

**Supplementary Figure 6. Synteny analysis among the *A. chinensis*, *C. clementina*, and *X. sorbifolium* genomes.** Dot plots showed the syntenic orthologs between *A. chinensis* and *C. clementina* (A), and between *C. clementina*, and *X. sorbifolium* (B).

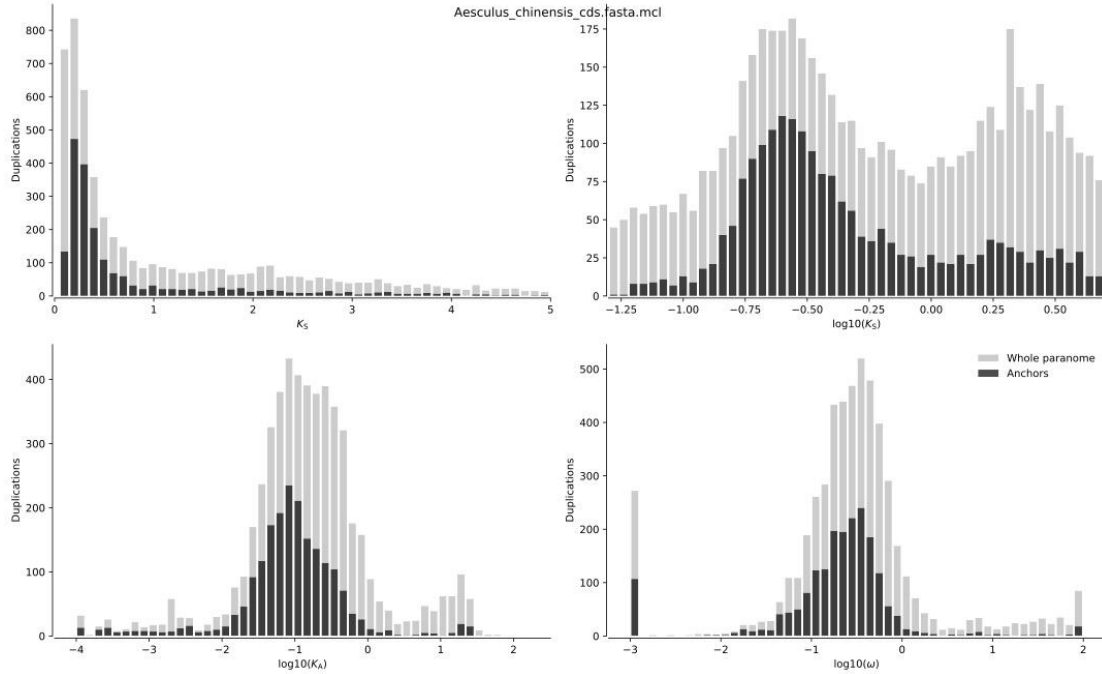

**Supplementary Figure 7.  $K_s$  distributions of whole paralogs (grey bars) and anchor-pair paralogs (black bars) for *A. chinensis*. Two obvious peaks in the  $\log_{10}(K_s)$  distributions indicated that there are at least two WGD events that occurred during the evolution of *A. chinensis*.**



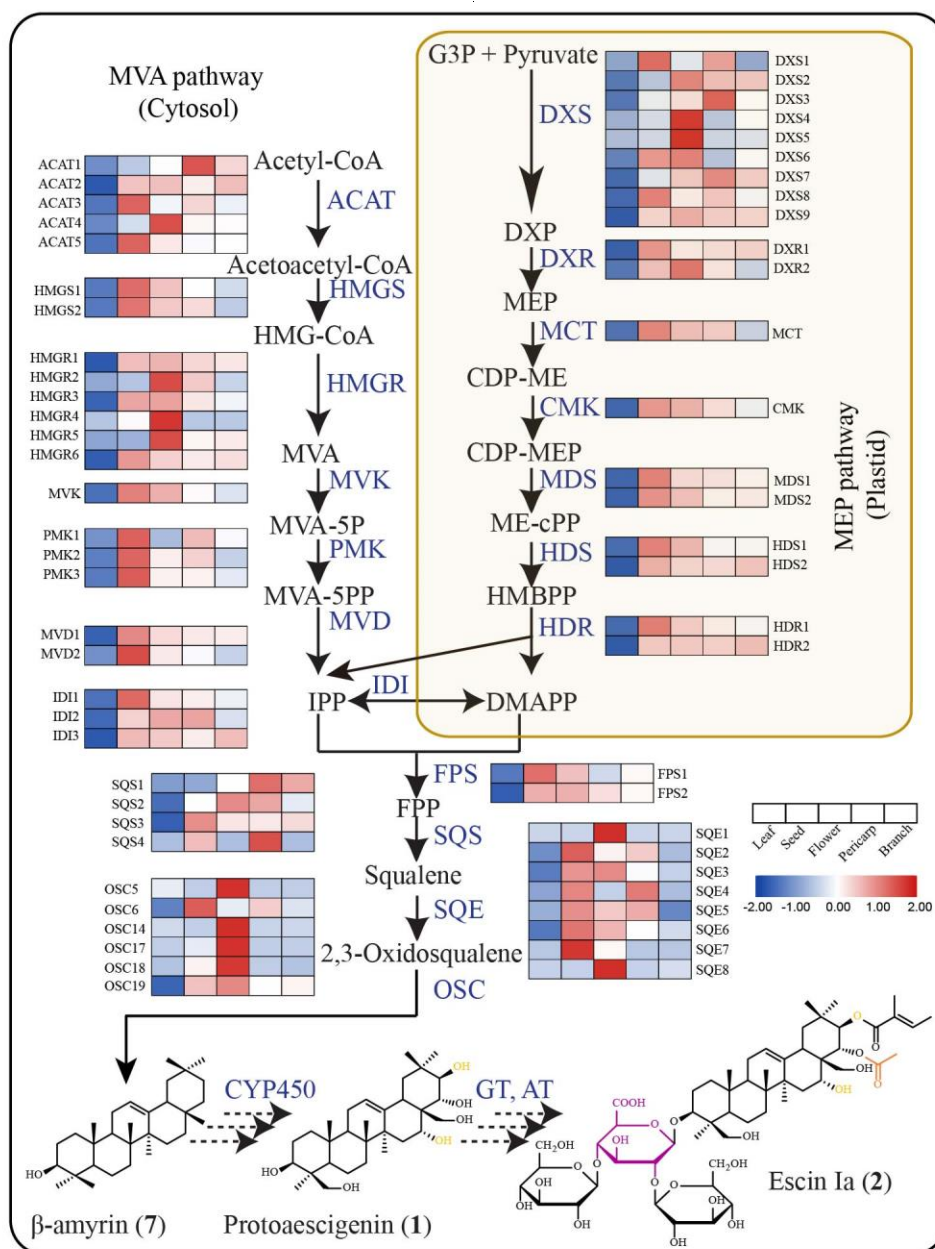

**Supplementary Figure 8. The gene expression heatmap of MEP and MVA genes contribute to biosynthesis of triterpenoids in *A. chinensis*. 1: Protoaescigenin; 2: Escin Ia; 7:  $\beta$ -amyrin. Source data are provided as a Source Data file.**

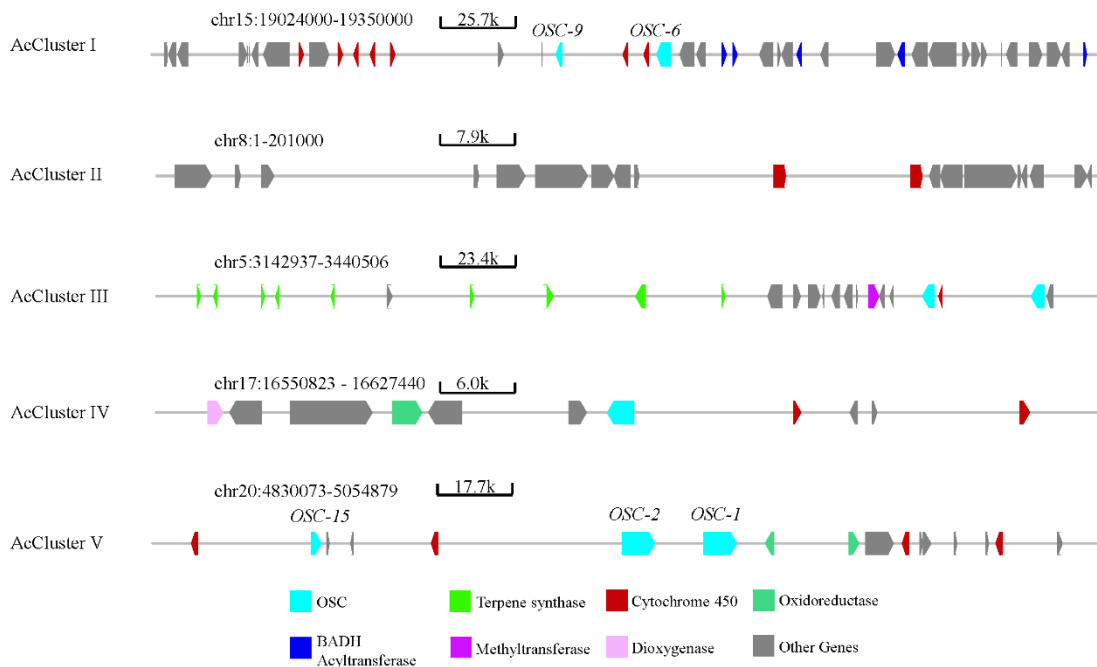

**Supplementary Figure 9. Five biosynthetic gene clusters (AcClusters I-V) related to triterpenoid biosynthesis in *A. chinensis* genome.** AcClusters I, III, IV and V containing skeleton OSCs and tailoring genes were searched in each chromosome of *A. chinensis* genome via the online tools of plantiSMASH (<http://plantismash.secondarymetabolites.org/>). AcCluster II was manually found.

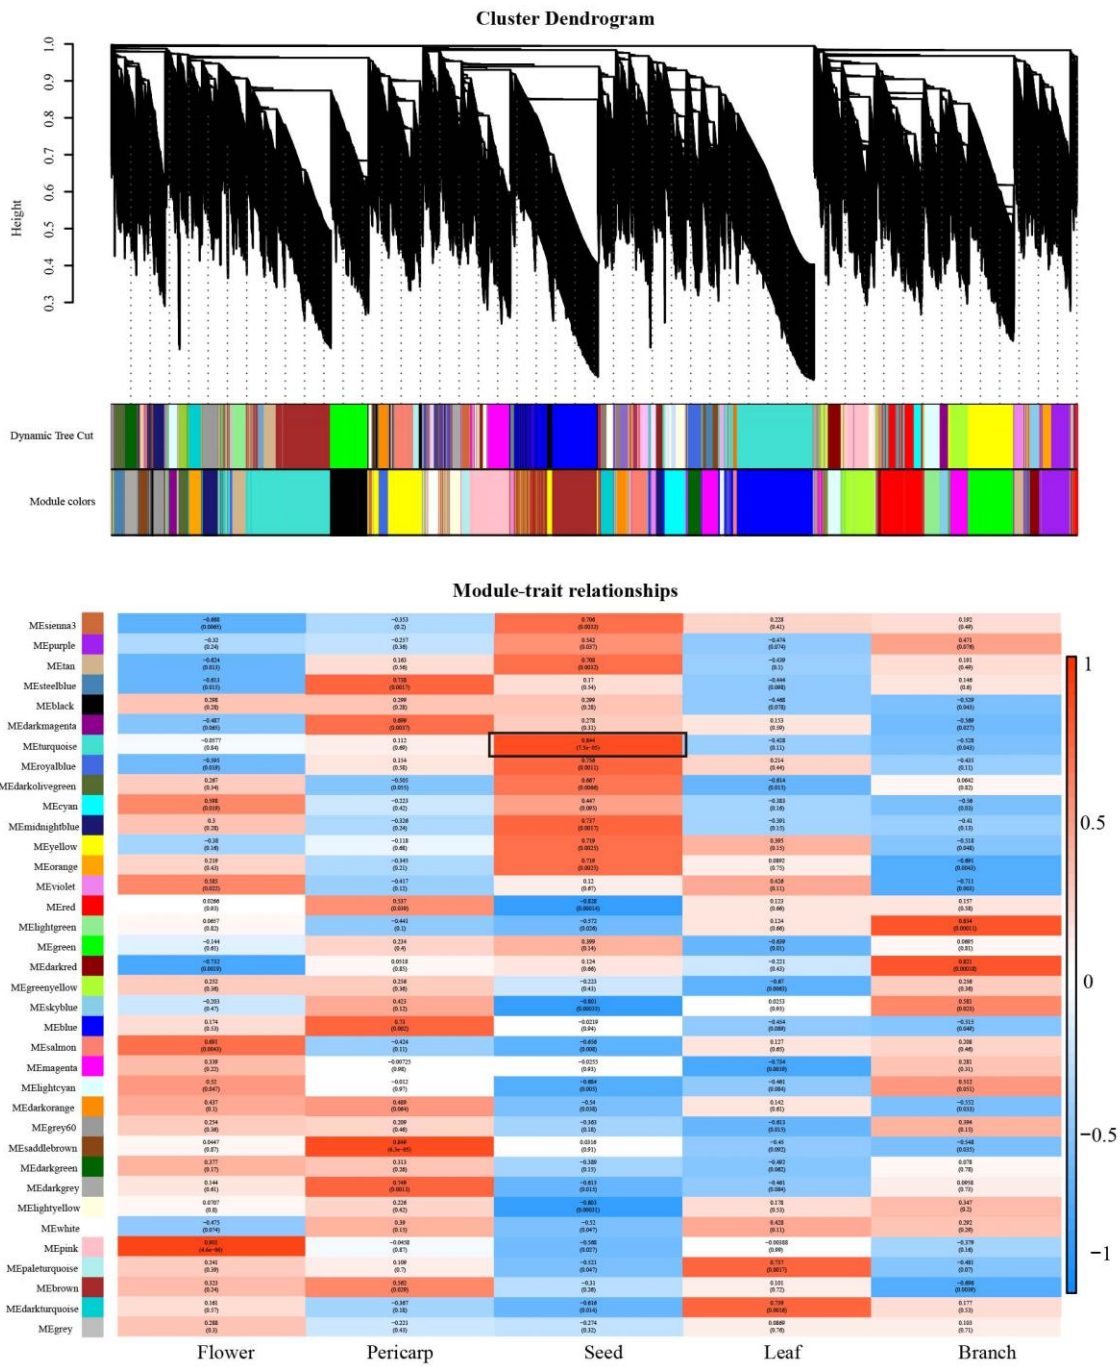

**Supplementary Figure 10. The WGCNA “turquoise” module associated with aescin biosynthesis.** Represented as a baits AcOSC6 and AcCLS1 connecting candidate P450, BAHDs and UGTs, see Supplementary Data 6.

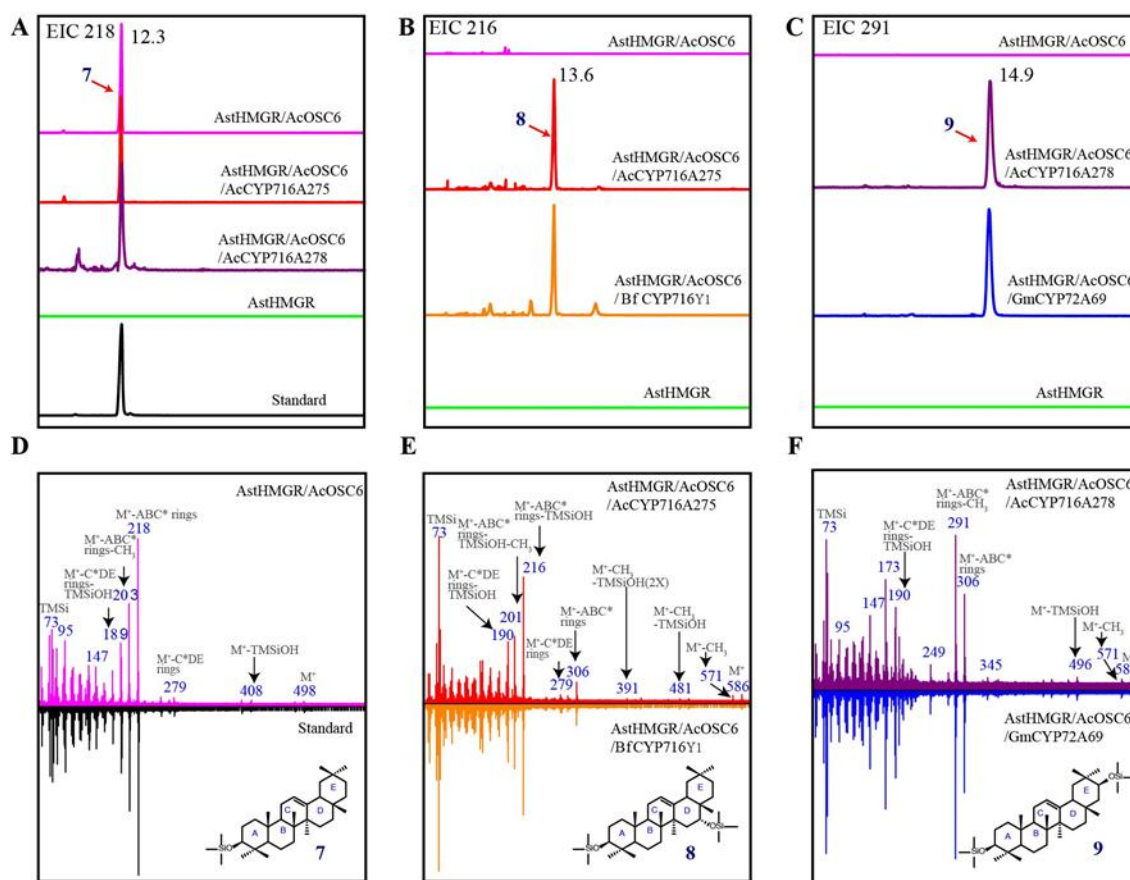

**Supplementary Figure 11. The function identification of AcOSC6, AcCYP716A275 and AcCYP716A278 through the *N. benthamiana* platform.** (A) EIC of  $\beta$ -amyrin ( $m/z$  218; positive ion mode) of samples from *N. benthamiana* leaves transiently expressing AstHMGR combined with AcOSC6, and with AcCYP716A275 or AcCYP716A278 compared to plants expressing AstHMGR alone and to  $\beta$ -amyrin standard. (B) EIC of  $16\alpha$ -hydroxy- $\beta$ -amyrin ( $m/z$  216; positive ion mode) of products from *N. benthamiana* leaves transiently expressing AstHMGR combined with AcOSC6, and with AcCYP716A275 or BfCYP716Y1. (C) EIC of  $21\beta$ -hydroxy- $\beta$ -amyrin ( $m/z$  291; positive ion mode) of products from *N. benthamiana* leaves transiently expressing AstHMGR combined with AcOSC6, and with AcCYP716A278 or GmCYP72A69. (D, E, F) GC-MS results of  $\beta$ -amyrin,  $16\alpha$ -hydroxy- $\beta$ -amyrin and  $21\beta$ -hydroxy- $\beta$ -amyrin. **7**:  $\beta$ -amyrin; **8**:  $16\alpha$ -hydroxy- $\beta$ -amyrin; **9**:  $21\beta$ -hydroxy- $\beta$ -amyrin. Source data are provided as a Source Data file.

Tree scale: 0.5

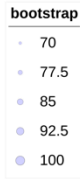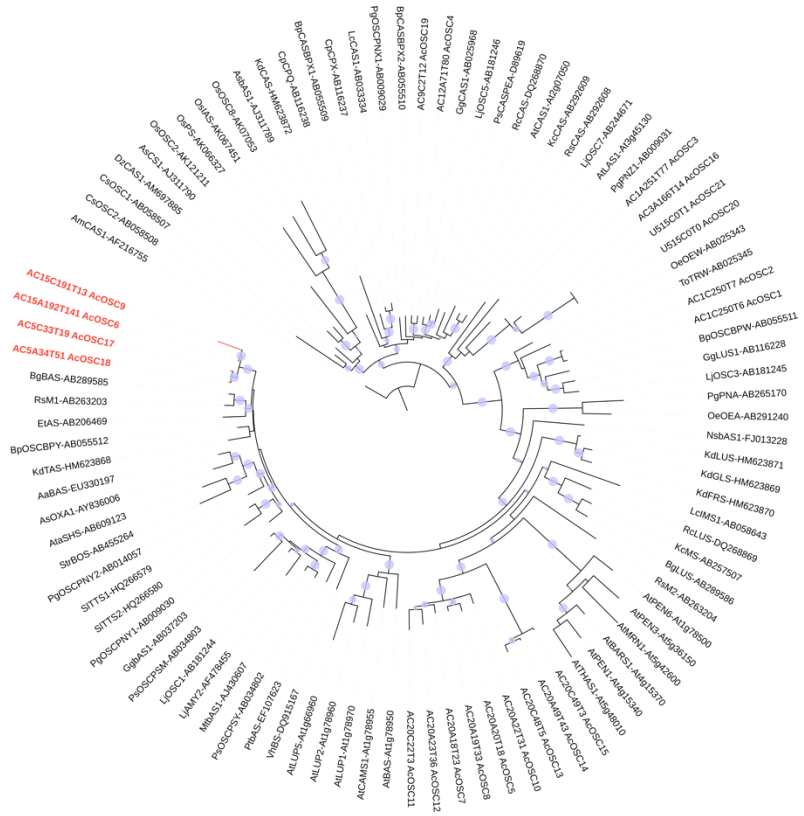

**Supplementary Figure 12. Phylogenetic analysis of OSC genes annotated from *A. chinensis* genome with the representatives of characterized OSC genes from different species. The grey circles on the branch represented nodes with a support value greater than 70%. Source data are provided as a Source Data file.**

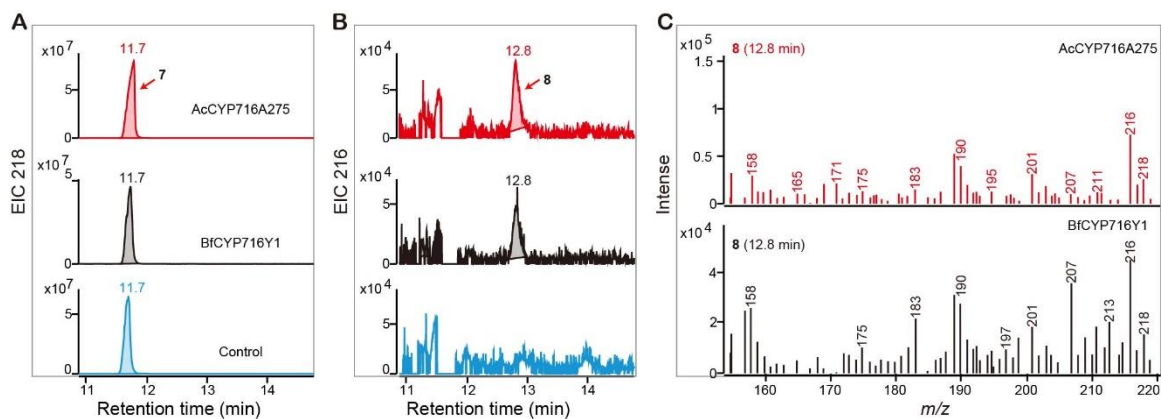

**Supplementary Figure 13. Expression of AcCYP716A275 results in the accumulation of 16 $\alpha$ -hydroxy- $\beta$ -amyryn in engineered yeast strains.** Retention time (A) and mass spectrum (B, C) to the products of BfCYP716Y1. **7:**  $\beta$ -amyryn; **8:** 16 $\alpha$ -hydroxy- $\beta$ -amyryn. Source data are provided as a Source Data file.

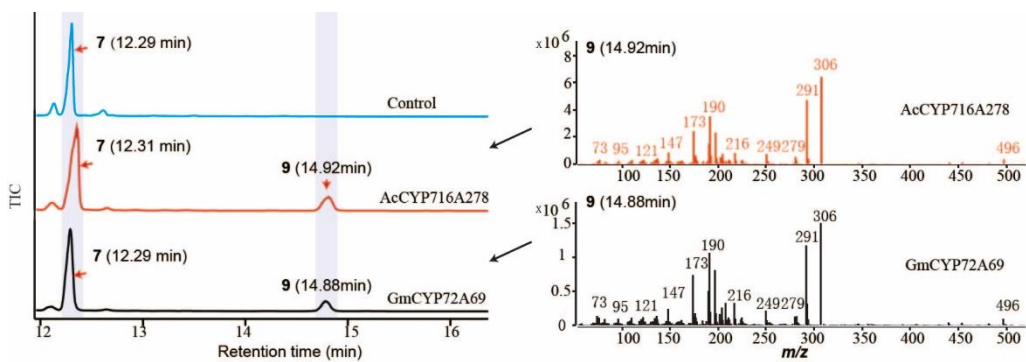

**Supplementary Figure 14. Expression of AcCYP716A278 results in the accumulation of 21β-hydroxy-β-amyryn in engineered yeast strains.** Retention time (left) and mass spectrum (right) to the products of GmCYP72A69. **7**: β-amyryn; **9**: 21β-hydroxy-β-amyryn. Source data are provided as a Source Data file.

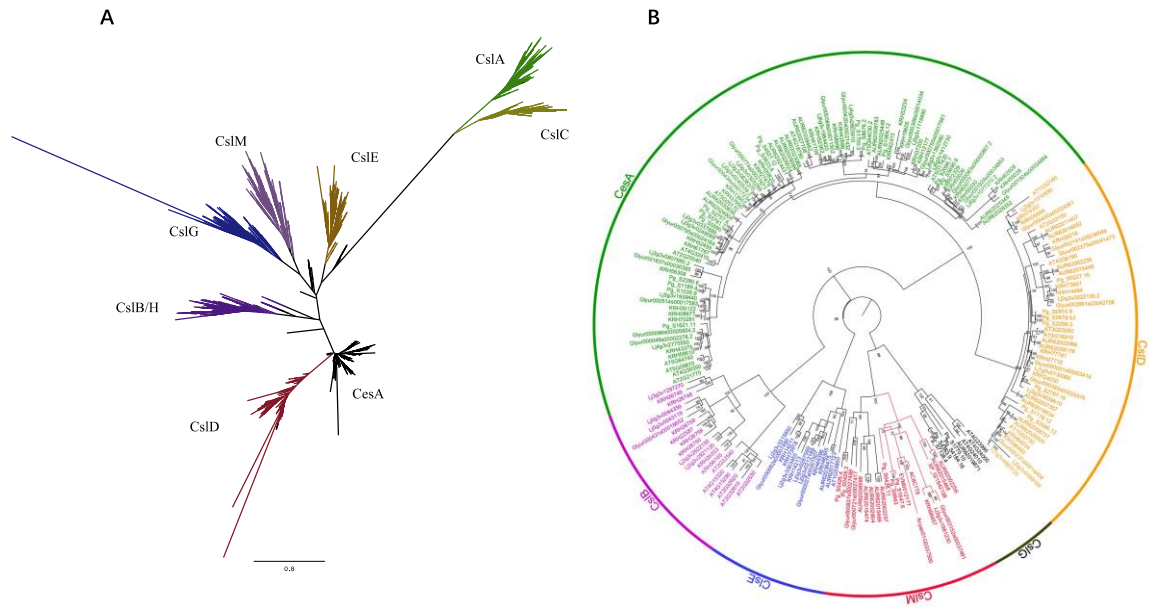

**Supplementary Figure 15. Phylogenetic analysis of cellulose-synthase genes.** (A) Phylogenetic analysis of 6268 cellulose-synthase superfamily genes from 144 reported angiosperm genomes. (B) The phylogenetic position of AcCSL with other proteins reported in the literature. The cellulose-synthase superfamily genes were annotated using PFAM of PF03552. Maximum likelihood tree was constructed using RAxML with 1000 bootstrap replicates. The branch support values greater than 70% were presented. Source data are provided as a Source Data file.



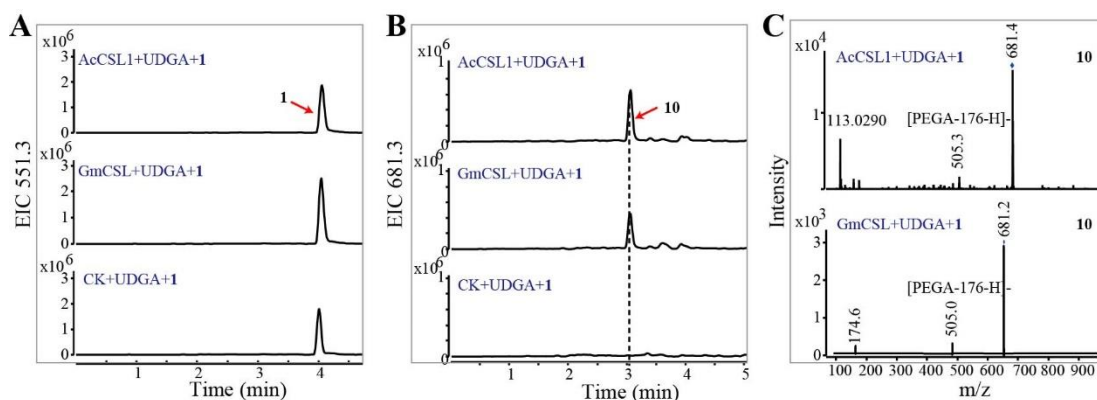

**Supplementary Figure 16. Enzymatic assays of AcCSL1 and GmCSyGT-containing microsomes.** (A) Overlay of LC-QQQ-MS/MS extracted ion chromatograms for protoaescigenin ( $m/z$  551.3589) detected in microsomes expressing AcCSL1 and GmCSyGT1. (B) Overlay of LC-QQQ-MS/MS extracted ion chromatograms for 3-*O*- $\beta$ -D-glucuronopyranosyl acid-protoaescigenin ( $m/z$  681.3856) produced in microsomes expressing AcCSL1 and GmCSyGT. (C) MS spectrums of AcCSL1 and GmCSyGT1 catalytic products. **1**: Protoaescigenin; **10**: 3-*O*- $\beta$ -D-glucuronopyranosyl acid-protoaescigenin. Source data are provided as a Source Data file.

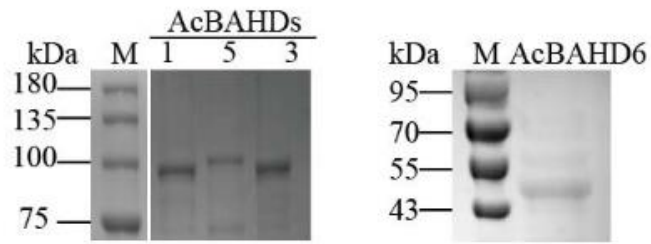

**Supplementary Figure 17. SDS-PAGE of the purified AcBAHD proteins.** M: Protein marker. Source data are provided as a Source Data file.

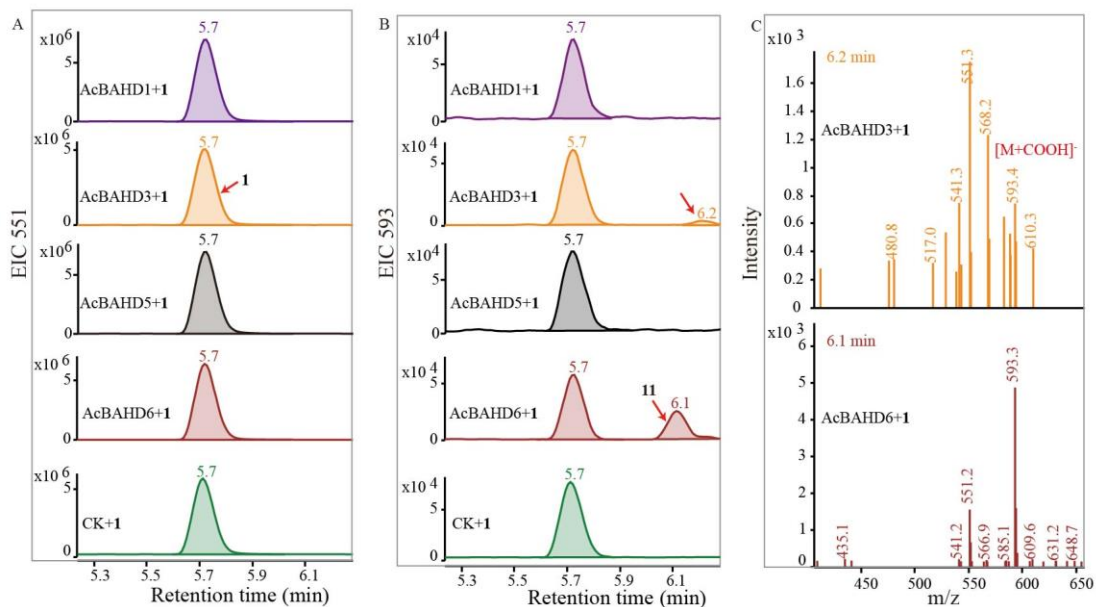

**Supplementary Figure 18. Enzymatic assays of AcBAHD3 and AcBAHD6 with protoaescigenin being substrate.** Overlay of LC-QQQ-MS/MS extracted ion chromatograms protoaescigenin ( $m/z$  551) (A) and 22-*O*-acetylprotoaescigenin ( $m/z$  593) (B) detected *in vitro* reactions expressing AcBAHD1, AcBAHD3, AcBAHD5 or AcBAHD6. (C) LC-QQQ-MS/MS spectrums of acylation products of protoaescigenin detected *in vitro* reactions expressing AcBAHD3 or AcBAHD6. **1**: Protoaescigenin; **11**: 22-*O*-acetylprotoaescigenin. Source data are provided as a Source Data file.

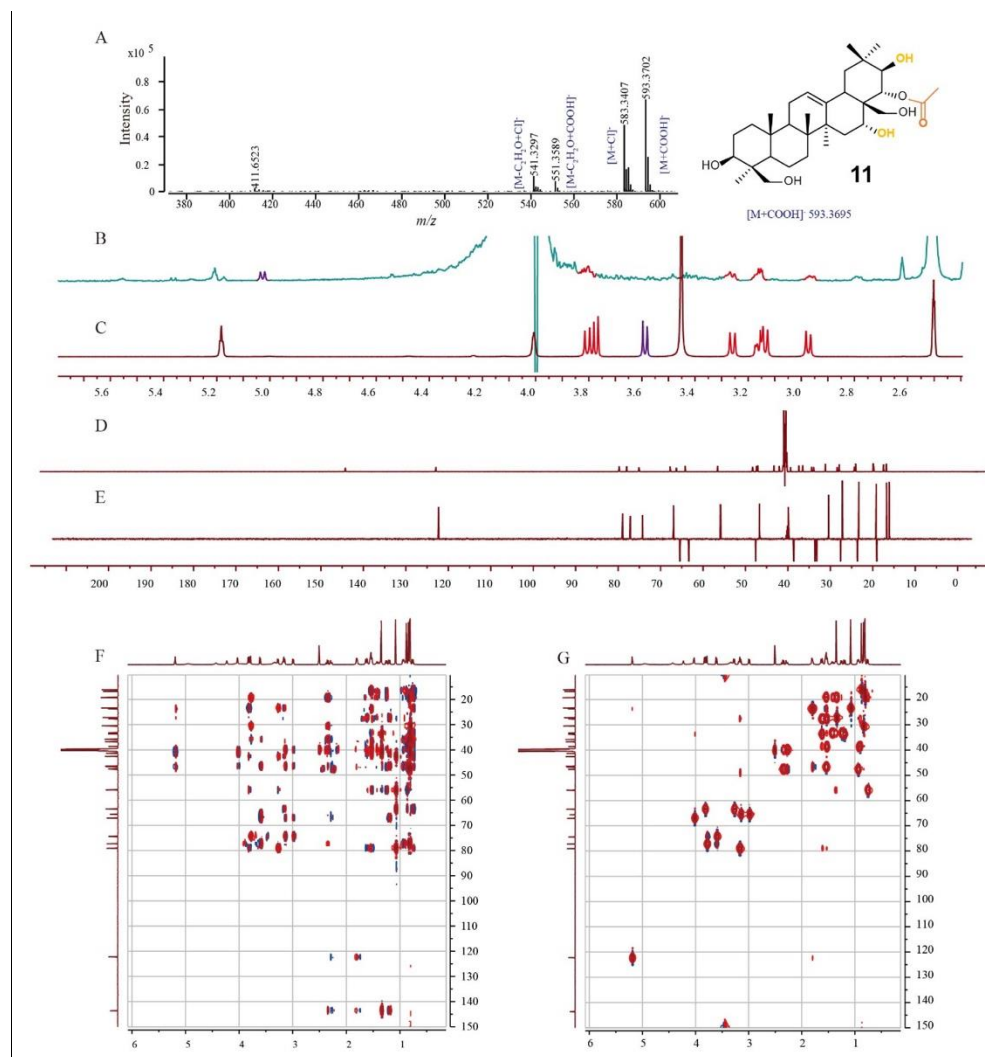

**Supplementary Figure 19. LC-QTOF-MS/MS of spectrum 22-O-acetylprotoaescigenin (A) and NMR spectra of protoaescigenin and 22-O-acetylprotoaescigenin.** (B)  $^1\text{H}$  spectrum for 22-O-acetylprotoaescigenin in Dimethylsulfoxide- $d_6$  ( $\delta$  ppm). (B-E) NMR spectra of protoaescigenin in Dimethylsulfoxide- $d_6$  ( $\delta$  ppm): (C)  $^1\text{H}$ ; (D)  $^{13}\text{C}$ ; (E) DEPT-135; (F) DEPT-edited-HSQC; (G) HMBC. The results of  $^1\text{H}$ -NMR showed that  $\text{H}_\beta$ -22 was at  $\delta$  3.59 in protoaescigenin, whereas in its acetate, the doublet was shifted to  $\delta$  5.01. A previous study reported that the  $^1\text{H}$ -NMR of acetylation sites of protoaescigenin, including  $\text{H}_\alpha$ -3 and  $\text{H}_\alpha$ -21, generate a chemical shift of  $\delta$  1.28 and 1.47, respectively. Therefore, we speculate the acetate in this study was 22-O-acetylprotoaescigenin (Konoshima, Takao, and Kuo-Hsiung Lee. 1986. Antitumor Agents, 82. Cytotoxic Sapogenols from *Aesculus hippocastanum*. J NAT PROD 49 (4):650-6.). **11**: 22-O-acetylprotoaescigenin.

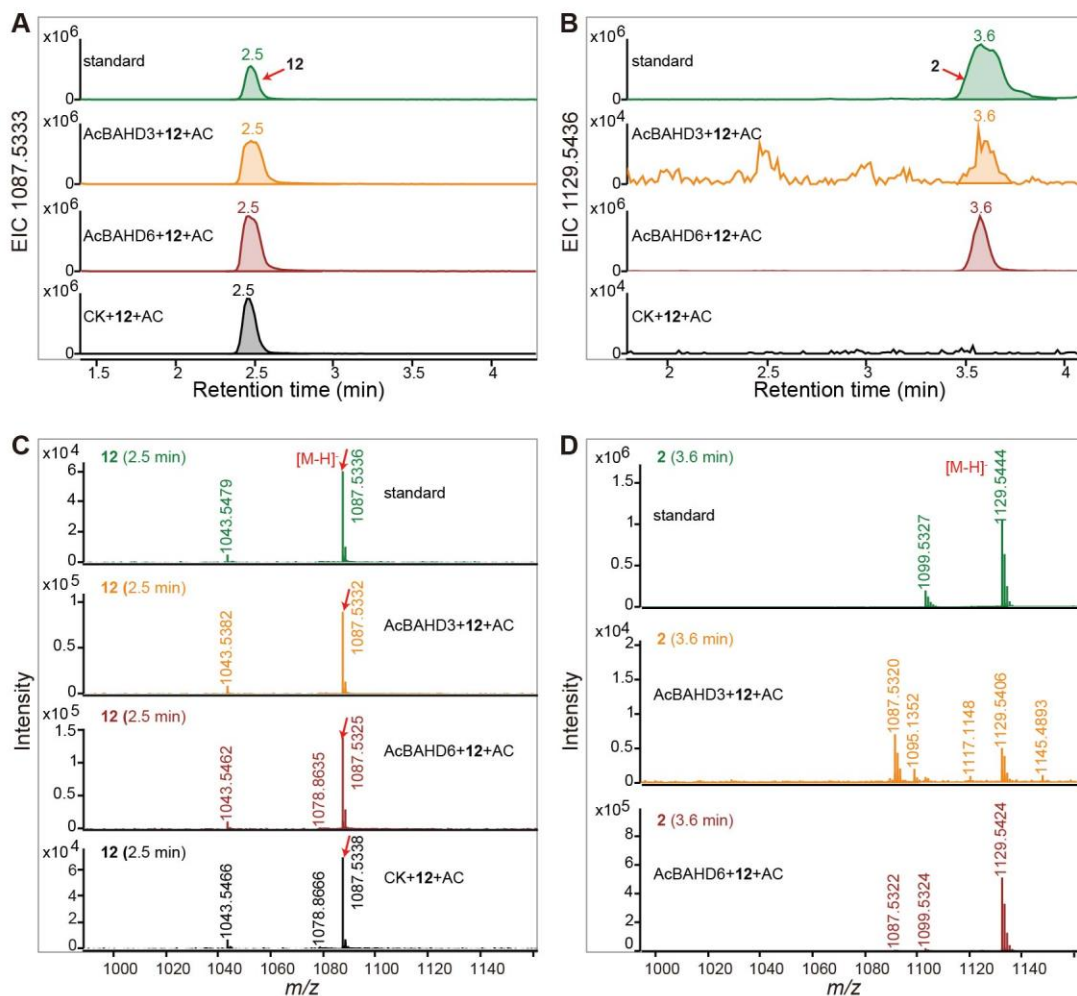

**Supplementary Figure 20. Enzymatic assays of AcBAHD3 and AcBAHD6 with desacetylescin Ia being substrate.** Overlay of LC-QTOF-MS/MS extracted ion chromatograms for desacetylescin Ia ( $m/z$  1087.5333) (A) and escin Ia ( $m/z$  1129.5436) (B) detected in corresponding standard or *in vitro* reactions expressing AcBAHD3 or AcBAHD6. MS spectrums of desacetylescin Ia (C) and escin Ia (D) were detected in corresponding standard or *in vitro* reactions expressing AcBAHD3 or AcBAHD6. **2**: Escin Ia; **12**: Desacetylescin Ia. Source data are provided as a Source Data file.

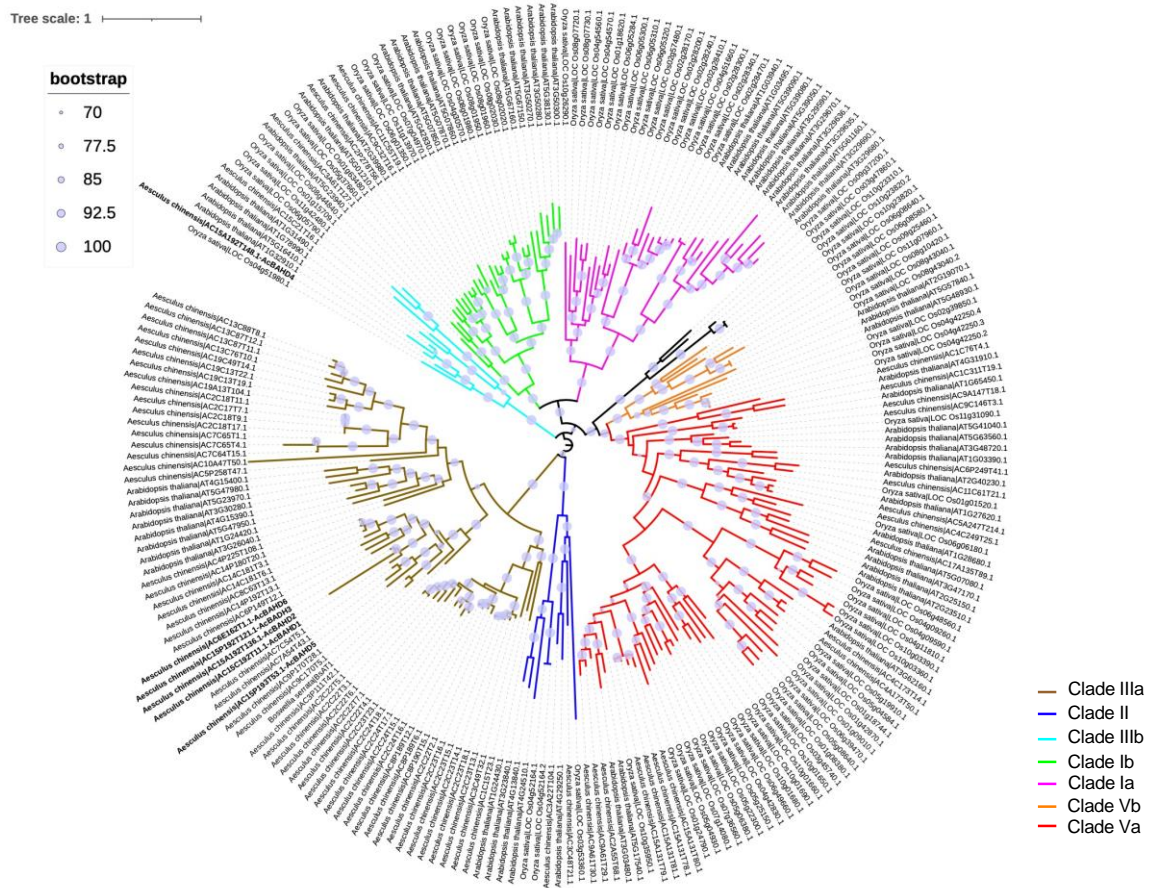

**Supplementary Figure 21. Phylogenetic analysis of BAHD genes annotated from *A. chinensis* genome with the representatives of characterized BAHD genes from different species. The grey circles on the branch represented nodes with a support value greater than 70%. Source data are provided as a Source Data file.**

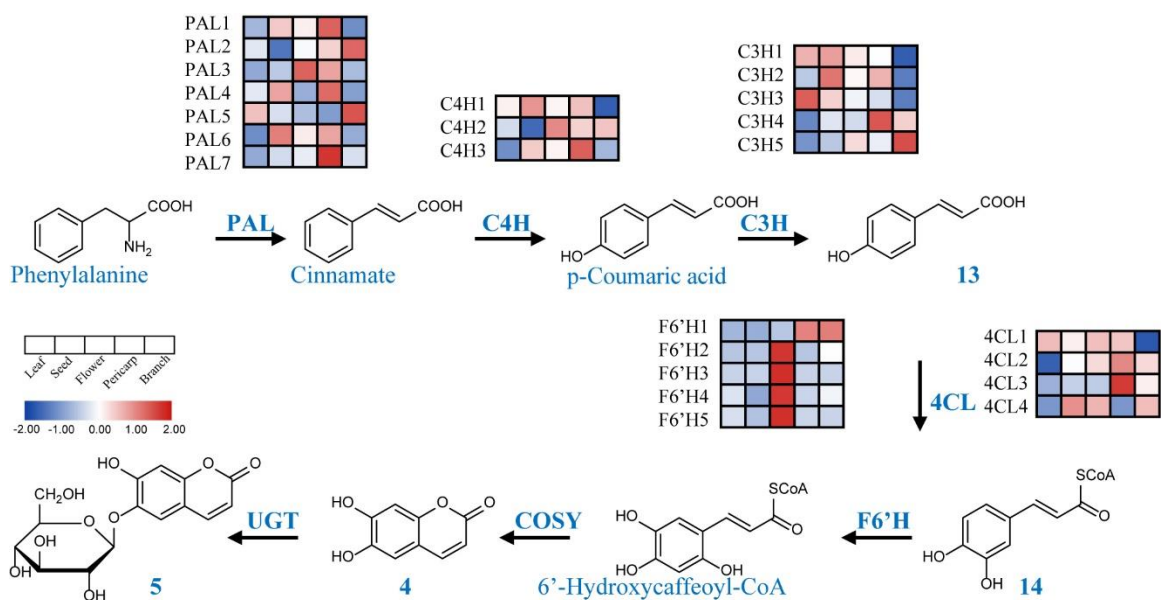

**Supplementary Figure 22. Genes involved in aesculin biosynthesis.** The biosynthesis of aesculin is represented in this simplified form. Genes associated with pathways identified by BLASTP. The expression value for each gene is indicated in color on log<sub>10</sub> (FPKM + 1) scale for five tissues: leaf, seed, flower, pericarp, and branch. **4**: Esculetin; **5**: Aesculin; **13**: Caffeic acid; **14**: Caffeoyl-CoA. Source data are provided as a Source Data file.

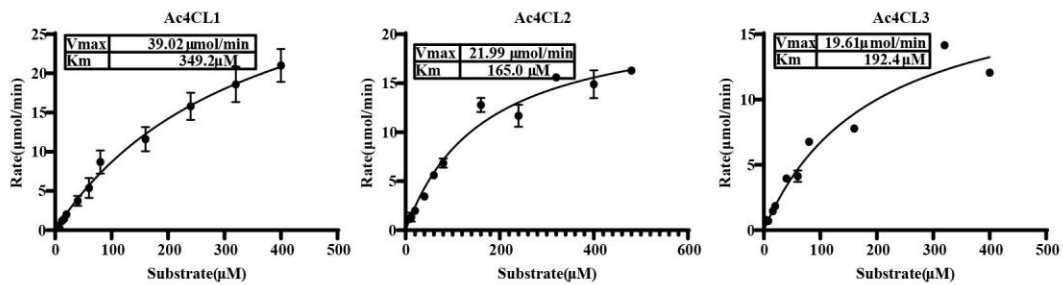

**Supplementary Figure 23. Enzymatic kinetics of Ac4CL1, Ac4CL2, and Ac4CL3 with caffeic acid as substrate, respectively.**



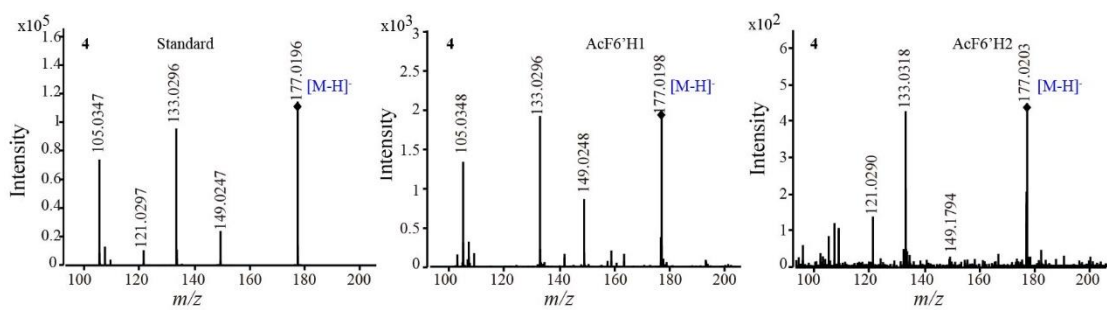

**Supplementary Figure 24. LC-QTOF-MS/MS spectrums of esculetin standard and products of *in vitro* reactions expressing AcF6'H1 or AcF6'H2. 4: Esculetin. Source data are provided as a Source Data file.**

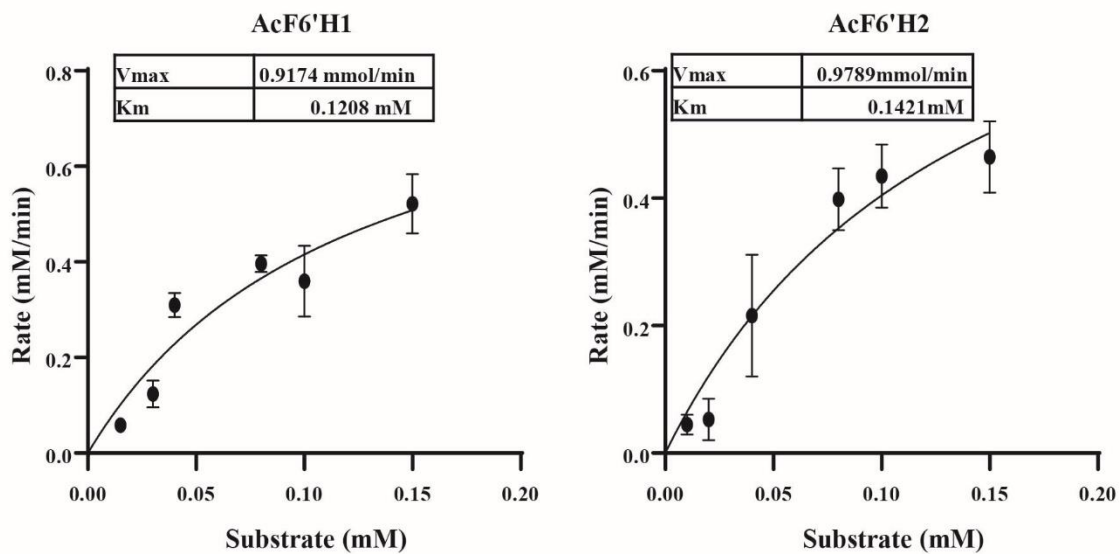

**Supplementary Figure 25. Enzymatic kinetics of AcF6'H1 and AcF6'H2 with caffeoyl-CoA as substrate, respectively. Source data are provided as a Source Data file.**

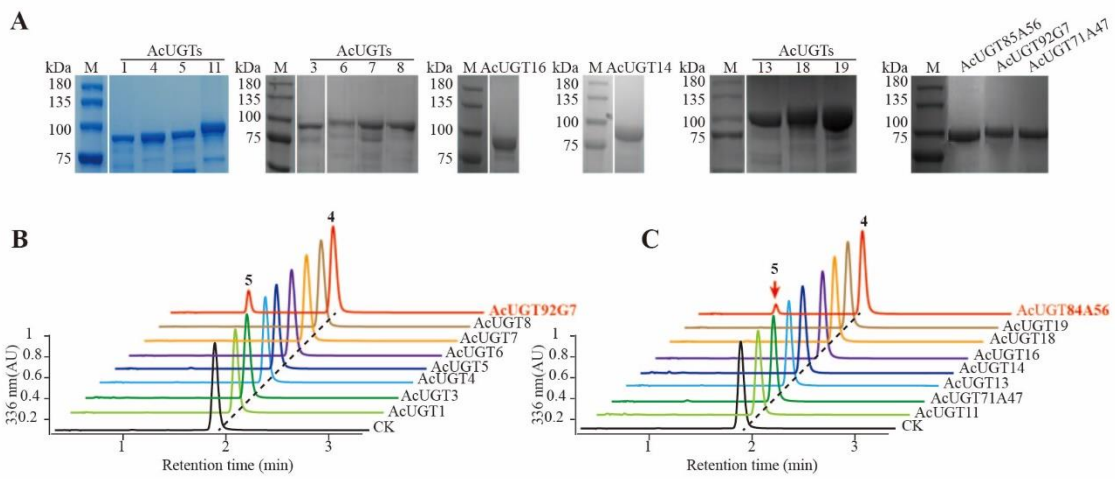

**Supplementary Figure 26. SDS-PAGE of the AcUGT proteins (A), and the UPLC spectrums of their enzyme activity analysis (B, C). 4: Esculetin; 5: Aesculin. Source data are provided as a Source Data file.**

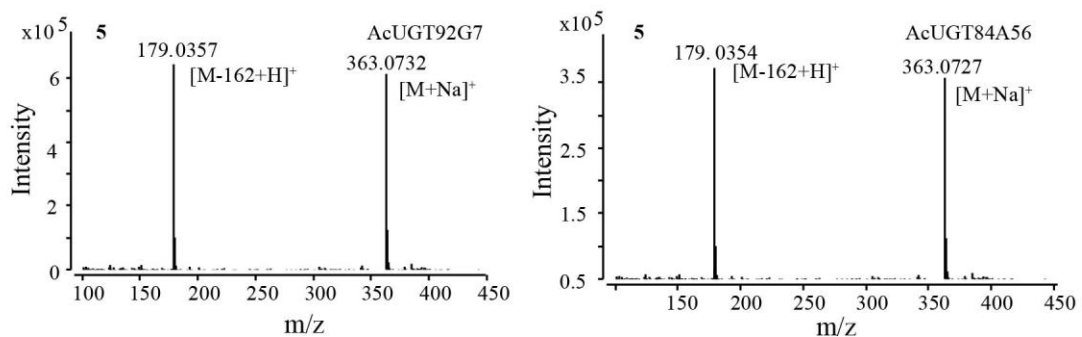

**Supplementary Figure 27.** LC-QTOF-MS/MS spectrums of aesculin produced by *in vitro* reactions expressing AcUGT92G7 or AcUGT84A56 towards esculetin. **5:** Aesculin.

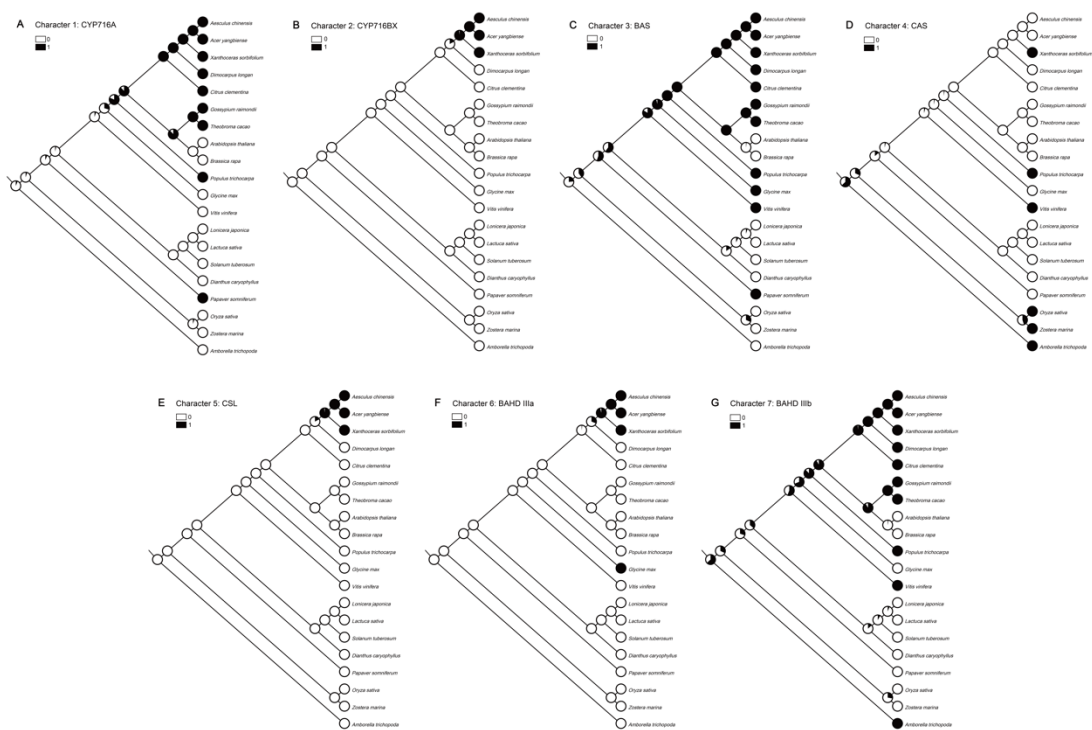

**Supplementary Figure 28. Ancestral state reconstructions of barrigenol-type triterpenoid biosynthetic gene clusters among angiosperms.** The binary traits were assigned to each leaf according to the presence (=1) or absence (=0) of targeted genes. A: CYP716A, B: CYP716BX, C: BAS, D: CAS, E: CSL, F: BAHD IIIa, G: BAHD IIIb. Source data are provided as a Source Data file.

**Supplementary Table 1. Linear ranges, calibration curves and correlation coefficients ( $R^2$ ) for escin Ia, escin Ib, protoaescigenin, esculetin, aesculin obtained by LC-QQQ-MS.**

| <b>Compounds</b> | <b>Linear range (<math>\mu\text{g/mL}</math>)</b> | <b>Calibration curve</b> | <b><math>R^2</math></b> |
|------------------|---------------------------------------------------|--------------------------|-------------------------|
| Escin Ia         | 9.96-1992                                         | $y=6508.4x+11.635$       | 0.9999                  |
| Escin Ib         | 10.06-2012                                        | $y=5321.9x+41.251$       | 0.9998                  |
| Protoaescigenin  | 0.76-152                                          | $y=76776x-32.278$        | 0.9993                  |
| Esculetin        | 1.94-388                                          | $y=94504x-170.37$        | 0.9996                  |
| Aesculin         | 1.78-356                                          | $y=55604x-181.53$        | 0.9992                  |

**Supplementary Table 2. Parameters of the Multiple Reaction Monitoring (MRM) for escin Ia, escin Ib, protoaescigenin, esculetin, aesculin.**

| <b>Compounds</b> | <b>Ion mode</b> | <b>Precursor ion (m/z)</b> | <b>Product Ion (m/z)</b> | <b>Fragmentor (V)</b> | <b>Collision energy voltage (V)</b> |
|------------------|-----------------|----------------------------|--------------------------|-----------------------|-------------------------------------|
| Escin Ia         | positive        | 1131.5                     | 969.5/789.5              | 170                   | 12/15                               |
| Escin Ib         | positive        | 1131.5                     | 969.5/789.5              | 170                   | 12/15                               |
| Esculetin        | negative        | 339.1                      | 176.9/163.1              | 90                    | 20/30                               |
| Aesculin         | negative        | 177.1                      | 133.1/104.9              | 120                   | 20/20                               |
| Protoaescigenin  | negative        | 551.4                      | 505.5/421.4              | 120                   | 20/38                               |

**Supplementary Table 3. Compounds information for MALDI imaging.**

| <b>Compound</b>     | <b>Molecular formula</b>                        | <b>Adduct ion</b>  | <b>Theoretical molecular mass</b> | <b>Molecular mass</b> |
|---------------------|-------------------------------------------------|--------------------|-----------------------------------|-----------------------|
| Escin Ia / Escin Ib | C <sub>55</sub> H <sub>86</sub> O <sub>24</sub> | [M+K] <sup>+</sup> | 1169.5152                         | 1169.5088             |



**Supplementary Table 4. Statistics of *A. chinensis* genome sequence data.**

| <b>Item</b>                        | <b>Value</b> |
|------------------------------------|--------------|
| Total reads from Nanopore platform | 3,662,658    |
| Total bases of Nanopore reads (Gb) | 34.12        |
| N50 length of Nanopore reads (bp)  | 11,740       |
| Minimum read length (bp)           | 1000         |
| Maximum read length (bp)           | 84,436       |
| Corrected long reads using CANU    | 1,229,382    |
| Corrected bases (Gb)               | 18.78        |
| N50 length of corrected reads (bp) | 14,455       |

**Supplementary Table 5. Statistics of *A. chinensis* genome assembly.**

| <b>Assembly</b>                | <b>Value</b> |
|--------------------------------|--------------|
| # Contigs                      | 656          |
| Total length (bp)              | 470039413    |
| Largest contig                 | 8581606      |
| N50 length                     | 2030109      |
| GC (%)                         | 35.55        |
| #Polished contigs              | 656          |
| Total length (bp)              | 470021348    |
| Largest contig                 | 8583990      |
| N50 length                     | 2049619      |
| GC (%)                         | 35.54        |
| # Hi-C                         |              |
| Clean Paired-end Reads         | 326,228,655  |
| Unique Mapped Paired-end Reads | 189,382,086  |
| Valid Paired-end Reads         | 174,576,440  |
| chr1 (bp)                      | 31,807,429   |
| chr2 (bp)                      | 29,407,995   |
| chr3 (bp)                      | 29,233,014   |
| chr4 (bp)                      | 27,081,713   |
| chr5 (bp)                      | 26,184,402   |
| chr6 (bp)                      | 26,484,559   |
| chr7 (bp)                      | 25,384,139   |
| chr8 (bp)                      | 24,827,435   |
| chr9 (bp)                      | 23,046,765   |
| chr10 (bp)                     | 22,692,868   |
| chr11 (bp)                     | 21,891,486   |
| chr12 (bp)                     | 21,749,535   |
| chr13 (bp)                     | 21,256,607   |
| chr14 (bp)                     | 20,301,677   |
| chr15 (bp)                     | 19,447,847   |
| chr16 (bp)                     | 16,939,248   |
| chr17 (bp)                     | 17,460,947   |
| chr18 (bp)                     | 17,149,361   |
| chr19 (bp)                     | 16,763,800   |
| chr20 (bp)                     | 14,195,357   |
| Total anchored (bp)            | 453,306,184  |
| Unanchored (bp)                | 14,542,953   |

**Supplementary Table 6. Assessment of the *A. chinensis* genome quality using Benchmarking Universal Single-Copy Orthologs (BUSCO).**

| <b>BUSCO notation</b>               | <b>Number</b> | <b>Percent</b> |
|-------------------------------------|---------------|----------------|
| Complete BUSCOs (C)                 | 1573          | 97.40%         |
| Complete and single-copy BUSCOs (S) | 1306          | 80.90%         |
| Complete and duplicated BUSCOs (D)  | 267           | 16.50%         |
| Fragmented BUSCOs (F)               | 18            | 1.10%          |
| Missing BUSCOs (M)                  | 23            | 1.50%          |
| Total BUSCO groups searched         | 1614          | 100%           |

**Supplementary Table 7. Annotation of *A. chinensis* TEs**

| <b>Repeat Class</b>     | <b>Elements number</b> | <b>Length occupied (bp)</b> | <b>Percentage of sequence</b> |
|-------------------------|------------------------|-----------------------------|-------------------------------|
| <b>Retrotransposon</b>  | <b>112,183</b>         | <b>125,858,360</b>          | <b>26.90 %</b>                |
| LINE                    | 15,739                 | 11,836,519                  | 2.53 %                        |
| LTR                     | 96,444                 | 114,021,841                 | 24.37 %                       |
| LTR- <i>Gypsy</i>       | 59,193                 | 74,596,830                  | 15.94 %                       |
| LTR- <i>Copia</i>       | 34,880                 | 37,310,178                  | 7.97 %                        |
| <b>DNA elements</b>     | <b>66,062</b>          | <b>27,870,276</b>           | <b>5.96 %</b>                 |
| <b>Unclassified TEs</b> | <b>390,503</b>         | <b>115,365,232</b>          | <b>24.66 %</b>                |
| Small RNA               | 429                    | 182,497                     | 0.04 %                        |
| Simple repeats          | 137,943                | 5,556,512                   | 1.19 %                        |
| Low complexity          | 21,798                 | 1,109,427                   | 0.24 %                        |
| <b>Total Repeats</b>    |                        | <b>276,695,955</b>          | <b>59.14 %</b>                |

Note: TEs, transposable elements; LTR, long terminal repeat; LINE, long interspersed nuclear elements; SINE, short interspersed nuclear elements.

**Supplementary Table 8. Summary of gene annotation in *A. chinensis* genome.**

---

|                            |         |
|----------------------------|---------|
| Number of proteins         | 36603   |
| Average gene length (bp)   | 2460.53 |
| Average CDS length (bp)    | 1098.19 |
| Average exons per gene     | 4.97    |
| Average exon length (bp)   | 221.09  |
| Average intron length (bp) | 344.4   |

---

# BUSCO

---

|                                     |               |
|-------------------------------------|---------------|
| Complete BUSCOs (C)                 | 1434 (88.80%) |
| Complete and single-copy BUSCOs (S) | 1208 (74.80%) |
| Complete and duplicated BUSCOs (D)  | 226 (14.00%)  |
| Fragmented BUSCOs (F)               | 106 (6.60%)   |
| Missing BUSCOs (M)                  | 74 (4.60%)    |
| Total BUSCO groups searched         | 1614 (100%)   |

---

**Supplementary Table 9. The  $K_S$  value for duplicated paralogous gene pairs related to terpene biosynthesis and coumarin biosynthesis in *A. chinensis* genome.**

| Gene_name             | Gene_ID      | Gene_name | Gene_ID      | $K_S$    |
|-----------------------|--------------|-----------|--------------|----------|
| #Terpene biosynthesis |              |           |              |          |
| DXS                   | AC1C306T25   | DXS       | AC3A21T134   | 0.280491 |
| HDR                   | AC13A82T109  | HDR       | AC19A18T145  | 0.241994 |
| SQS                   | AC13A90T97   | SQS       | AC19C11T29   | 0.2624   |
| SQS                   | AC13A91T147  | SQS       | AC19A11T157  | 0.32083  |
| MCT                   | AC13A199T38  | MCT       | AC19A148T47  | 0.459658 |
| HMGR                  | AC13A102T193 | HMGR      | AC19C0T21    | 0.30671  |
| MVK                   | AC2C14T16    | MVK       | AC3A41T160   | 0.477488 |
| IDI                   | AC2A91T25    | IDI       | AC9C133T12   | 0.192534 |
| MDS                   | AC3C88T16    | MDS       | AC5C231T33   | 0.207768 |
| DXR                   | AC3C102T10   | DXR       | AC5C219T15   | 0.23434  |
| HMGS                  | AC3A137T80   | HMGS      | AC5A191T108  | 0.18119  |
| HMGR                  | AC4A263T167  | HMGR      | AC5A260T348  | 0.292022 |
| FPS                   | AC5A3T158    | FPS       | AC8A245T219  | 0.183657 |
| SQE                   | AC6A11T152   | SQE       | AC10A9T132   | 0.455258 |
| HMGR                  | AC6A222T217  | HMGR      | AC14A0T85    | 0.27408  |
| PMK                   | AC7A158T26   | PMK       | AC12A79T156  | 0.156692 |
| ACAT                  | AC7A246T98   | ACAT      | AC12C88T31   | 0.247342 |
| ACAT                  | AC7C41T19    | ACAT      | AC16C106T6   | 0.228154 |
| DXS                   | AC7A15T198   | DXS       | AC16C149T14  | 0.37003  |
| HDS                   | AC8A40T137   | HDS       | AC15A169T136 | 0.22292  |
| MVD                   | AC9C189T7    | MVD       | AC11A73T149  | 0.303409 |
| OSC                   | AC9C2T12     | OSC       | AC12A71T80   | 0.170068 |
| Average $K_S$         |              |           |              | 0.2758   |

**Supplementary Table 10. Genome wide identification and expression analysis of OSC gene family members in *A. chinensis* genome.**

| Gene_name | Gene ID      | Length<br>(aa) | Full-length/<br>Partial | Flower | Pericarp | Seed    | Leaf  | Branch |
|-----------|--------------|----------------|-------------------------|--------|----------|---------|-------|--------|
| AcOSC1    | AC1C250T6    | 757            | Full                    | 0.12   | 0.00     | 0.30    | 0.08  | 0.25   |
| AcOSC2    | AC1C250T7    | 731            | Full                    | 0.00   | 0.00     | 0.00    | 0.00  | 0.00   |
| AcOSC3    | AC1A251T77   | 710            | Full                    | 0.03   | 0.03     | 0.00    | 0.00  | 0.00   |
| AcOSC4    | AC12A71T80   | 552            | Partial                 | 15.16  | 5.77     | 11.83   | 9.26  | 2.41   |
| AcOSC5    | AC20A20T18   | 763            | Full                    | 4.98   | 0.00     | 0.00    | 16.42 | 0.00   |
| AcOSC6    | AC15A192T141 | 765            | Full                    | 17.14  | 93.93    | 1116.67 | 27.87 | 14.44  |
| AcOSC7    | AC20A18T23   | 775            | Full                    | 0.18   | 0.00     | 0.00    | 0.00  | 0.00   |
| AcOSC8    | AC20A19T33   | 763            | Full                    | 0.19   | 0.00     | 0.03    | 4.03  | 0.00   |
| AcOSC9    | AC15C191T13  | 296            | Partial                 | 0.00   | 0.19     | 0.90    | 3.55  | 0.00   |
| AcOSC10   | AC20A22T31   | 159            | Partial                 | 0.00   | 0.00     | 0.00    | 0.00  | 0.00   |
| AcOSC11   | AC20C22T3    | 377            | Partial                 | 0.00   | 0.00     | 0.00    | 0.00  | 0.14   |
| AcOSC12   | AC20A23T36   | 338            | Partial                 | 0.06   | 0.00     | 0.00    | 0.07  | 0.00   |
| AcOSC13   | AC20C48T5    | 236            | Partial                 | 0.00   | 0.00     | 0.00    | 0.00  | 0.00   |
| AcOSC14   | AC20A49T43   | 761            | Full                    | 7.62   | 0.04     | 0.00    | 0.11  | 0.07   |
| AcOSC15   | AC20C49T3    | 763            | Full                    | 0.00   | 0.00     | 0.00    | 0.00  | 0.00   |
| AcOSC16   | AC3A166T14   | 218            | Partial                 | 0.00   | 0.00     | 0.00    | 0.00  | 0.00   |
| AcOSC17   | AC5C33T19    | 765            | Full                    | 61.02  | 0.00     | 0.75    | 0.00  | 0.00   |
| AcOSC18   | AC5A34T51    | 765            | Full                    | 6.31   | 0.09     | 0.87    | 0.00  | 0.00   |
| AcOSC19   | AC9C2T12     | 757            | Full                    | 30.15  | 9.81     | 17.75   | 14.11 | 10.73  |
| AcOSC20   | U515C0T0     | 369            | Partial                 | 0.00   | 0.00     | 0.00    | 0.00  | 0.00   |
| AcOSC21   | U515C0T1     | 369            | Partial                 | 0.00   | 0.00     | 0.00    | 0.00  | 0.00   |

**Supplementary Table 11. The genes related to aesculin biosynthesis in *A. chinensis* genome.**

| <b>Gene ID</b> | <b>Gene name</b> | <b>Leaf</b> | <b>Branch</b> | <b>Flower</b> | <b>Pericarp</b> | <b>Seed</b> |
|----------------|------------------|-------------|---------------|---------------|-----------------|-------------|
| AC11A12T142    | <i>C4H1</i>      | 80.20       | 158.21        | 77.61         | 114.28          | 16.06       |
| AC1P247T31     | <i>C4H2</i>      | 4.60        | 0.90          | 17.75         | 9.94            | 11.07       |
| AC17C169T13    | <i>C4H3</i>      | 64.85       | 223.13        | 173.60        | 451.54          | 90.08       |
| AC9A176T47     | <i>4CL1</i>      | 139.96      | 73.65         | 133.34        | 123.66          | 3.76        |
| AC20C69T2      | <i>4CL2</i>      | 9.93        | 72.65         | 105.14        | 235.00          | 105.53      |
| AC6A236T104    | <i>4CL3</i>      | 4.55        | 6.69          | 6.35          | 59.44           | 12.78       |
| AC4A229T161    | <i>4CL4</i>      | 0.00        | 0.05          | 0.04          | 0.00            | 0.04        |
| AC8C10T15      | <i>F6'H1</i>     | 0.34        | 0.12          | 0.94          | 56.55           | 62.52       |
| AC8C10T10      | <i>F6'H2</i>     | 0.00        | 0.00          | 34.16         | 0.00            | 1.53        |
| AC12A191T46    | <i>F6'H3</i>     | 0.00        | 0.00          | 0.13          | 0.00            | 0.00        |
| AC12A191T45    | <i>F6'H4</i>     | 0.28        | 0.00          | 1.74          | 0.21            | 0.37        |
| AC12A189T24    | <i>F6'H5</i>     | 0.13        | 0.00          | 1.44          | 0.08            | 0.07        |
| AC18C24T16     | <i>PAL1</i>      | 54.73       | 98.10         | 83.95         | 149.65          | 44.36       |
| AC18C24T18     | <i>PAL2</i>      | 8.78        | 4.58          | 9.68          | 12.15           | 19.00       |
| AC18C24T19     | <i>PAL3</i>      | 0.03        | 0.65          | 19.19         | 8.69            | 0.34        |
| AC2A266T235    | <i>PAL4</i>      | 163.61      | 354.97        | 102.97        | 513.10          | 91.05       |
| AC1P284T125    | <i>PAL5</i>      | 53.71       | 24.08         | 17.11         | 12.13           | 125.55      |
| AC15A167T55    | <i>PAL6</i>      | 4.16        | 108.29        | 30.99         | 70.49           | 7.11        |
| AC11A81T120    | <i>PAL7</i>      | 30.04       | 46.48         | 53.80         | 244.96          | 48.25       |



**Supplementary Table 12. The genes and designed primers for the functional identification of UGTs in *A. chinensis* genome. Note, AcUGTs failed to expressing protein were marked as red font.**

| IDs     | Names             | Gene IDs          | Primer (F)                           | Primer (R)                       |
|---------|-------------------|-------------------|--------------------------------------|----------------------------------|
| AcUGT1  |                   | AC11P195T5.1      | aaagaattcATGGAAAGAAAGCAAGAAAAG       | aaagtcgacTTACAGTACATGAGTTTCTTT   |
| AcUGT2  |                   | AC12C34T14.1      | tttGGATCCATGGGTCATCTCATCCCAC         | aaaGTCGACTCAATTTTTGTGGTTCAACTTTT |
| AcUGT3  |                   | AC12C73T24.1      | tttggatccATGGAAGTATGCAAGCAAATA       | ttaagctTTAGAGTGCTTTACGGCTAA      |
| AcUGT4  |                   | AC14C44T13.1      | aaaggatccATGGCTAGCTTTGGTCATAT        | ttaagctTTACTCGTTTTTGTAATTTGAA    |
| AcUGT5  |                   | AC15C184T29.1     | aaaggatccATGAAGAAAGCAGAGCTGAT        | aaagtcgacTTATGGAAAATTCATACCAATG  |
| AcUGT6  |                   | AC15C85T3.1       | aaaggatccATGTCACGAGGACTTGTC          | aaagtcgacCATTGTTGTTTTCTTGCCCTT   |
| AcUGT7  |                   | AC8P181T12.1      | ttaagctTTATGTGCTTGTTTCATGATAT        | aaaGTCGACTTGATAGCCTGTCTTTAGCT    |
| AcUGT8  |                   | AC18C29T8.1       | aaagaattcATGGCCGCCACCCAAATCCA        | aaactgcagTTAATAGTGCTTGCTCTGCC    |
| AcUGT9  | <b>AcUGT84A56</b> | AC19C29T9.1       | aaaggatccATGGGTCTCAATCTCTTGT         | aaactgcagCTAGCAAGTGACCTCCAC      |
| AcUGT10 |                   | AC19C4T23.1       | tttGTCGACATGGCTATGGCTGAACCAGA        | tttAAGCTTTCATGGTTTAGTACTTGCTG    |
| AcUGT11 |                   | AC1C283T16.1      | aaaggatccATGTTTCCATGGCTAGCTTA        | ttgtcgacTCAAAGAGACCGAGTTGAA      |
| AcUGT12 |                   | AC2C229T6.1       | aaaggatccATGCAGAAAGCAGAGCTTG         | ttgtcgacTTATGAAATGTTGTCGATCAC    |
| AcUGT13 |                   | AC2C230T2.1       | aaaggatccATGCAGAAAGCGGAGCTT          | ttgtcgacTTATGAAATGTTGTCGATCA     |
| AcUGT14 |                   | AC10C43T8.1       | aaaggatccATGAGTTGAAAGTAGTTGGTT       | aaactgcagAGAGAGCTTGTAAGATAAAAC   |
| AcUGT15 |                   | AC4A198T170.1     | tttGGATCCATGGCGGATGAACAAGTATTG       | tttAAGCTTTTACTCGCTGCAAGGATGAT    |
| AcUGT16 |                   | AC4P194T62.1      | aaaggatccATGGGTCATCTCATCCCAC         | ttaagctTCAATTTTTGTTGTTCCACTT     |
| AcUGT17 | <b>AcUGT92G7</b>  | <b>AC7C90T5.1</b> | tttggatccATGGCTTGACAGCAGTGATG        | ttaagctATAAGTGATTTGCAGGACGT      |
| AcUGT18 |                   | AC8C14T21.1       | aaaggaaggattcaCTAAACTCCTTATCAAGATAAA | aaagtcgacTCAACGGCAGTGATTCTGG     |
| AcUGT19 |                   | AC9P140T38.1      | aaagaattcATGGTTTCAGAAGATGATCAA       | aaactgcagTCTGATATCCTTTATTAGATTC  |

**Supplementary Table 13. Kinetic assay of AcUGT92G7 and AcUGT84A56 towards esculetin.**

| <b>AcUGTs</b> | <b>Substrate</b> | <b><math>V_{\max}</math>(nmol·min<sup>-1</sup>)</b> | <b><math>K_M</math>(<math>\mu</math>M)</b> | <b><math>k_{\text{cat}}</math>(s<sup>-1</sup>)</b> | <b><math>k_{\text{cat}}/K_M</math>(s<sup>-1</sup>·M<sup>-1</sup>)</b> |
|---------------|------------------|-----------------------------------------------------|--------------------------------------------|----------------------------------------------------|-----------------------------------------------------------------------|
| AcUGT92G7     | Esculetin        | 0.029±0.003                                         | 48.957±6.324                               | 0.010±0.001                                        | 210.653±25.579                                                        |
| AcUGT84A56    | Esculetin        | 0.005±0.000                                         | 177.250±3.748                              | 0.001±0.000                                        | 7.050±0.107                                                           |

**Supplementary Table 14. The designed primers for the functional identification of escin Ia biosynthetic genes in *A. chinensis* genome.**

| Names        | Gene IDs       | Primers (F)                                       | Primers (R)                                     |
|--------------|----------------|---------------------------------------------------|-------------------------------------------------|
| AcOSC6       | AC15A192T141.1 | ATGTGGAAACTGAAGACAGCAGA                           | CTAAGCAGCAGTAATCTTGGATGG                        |
| AcCYP716A278 | AC15C190T21.1  | ATGGCTTGCAGCAGTGATG                               | ATAAGTGATTTGCAGGACGT                            |
| AcCYP716A275 | AC8C1T11.1     | ATGGAGTTGTTCTTGGTTATACTC                          | TCAGTGATGAGGAATAAGACGAA                         |
| AcBAHD1      | AC15C192T11.1  | tttGAATTCATGGAAGTCCGCATCAT<br>TTCTA               | aaaGTCGACTCATATCACATTCACACTAGGA                 |
| AcBAHD3      | AC15P192T121.1 | tttGAATTCATGGAAGTCCGCATCAT<br>TTCT                | tttGTCGACTCATATCACATTCACACTAGGA                 |
| AcBAHD5      | AC15P193T53.1  | tttGAATTCATGGATGTCAAAATCAT<br>TTCTAC              | tttGTCGACTTAGGCTGGATTGAAAGAAGC                  |
| AcBAHD6      | AC6E162T1      | ATGGGTCGCGGATCCGAATTCATG<br>GAAAAAAGCAGCATCATTTCT | TGCGGCCCAAGCTTGTGCGACTGTGGTTGG<br>ATTAAAGGAAGCA |
| AcCSL1       | AC8C1T8.1      | tttGGATCCGATGGGTGATCTTCATT<br>CCC                 | tttGTCGACTTAATTTGTTTTGCTCTTGCTT                 |

**Supplementary Table 15. The designed primers for the functional identification of aesculin biosynthetic genes in *A. chinensis* genome.**

| Names   | Gene IDs       | Primers (F)                                      | Primers (R)                                            |
|---------|----------------|--------------------------------------------------|--------------------------------------------------------|
| Ac4CL1  | AC6A236T104.1  | gccatggctgatatcggatccATGGCGGACAAAGA<br>AGATCATC  | tgcggccgcaagcttgcgacTTAATTGGGTAGACCG<br>GTGGC          |
| Ac4CL2  | AC9A176T47.1   | gccatggctgatatcggatccATGATTTCCATTGCT<br>GATCATCC | tgcggccgcaagcttgcgacTTAAGAAATTGGGGAG<br>GGTGG          |
| Ac4CL3  | AC20C69T2.1    | gccatggctgatatcggatccATGTCTCCCAATTA<br>AGCCAAG   | tgcggccgcaagcttgcgacTTAGTTTGATATCCA<br>GCTTCTAGCT      |
| AcF6'H1 | AC8C10T10.1    | gccatggctgatatcggatccATGGCACCAGCAATC<br>TCTATCTC | tgcggccgcaagcttgcgacTTAGTCGGCGATCTTT<br>GCAAA          |
| AcF6'H2 | AC8C10T15.1    | gccatggctgatatcggatccATGGCACCAGCGATC<br>TCTATCT  | tgcggccgcaagcttgcgacTCAAACCTTCTGTGATC<br>TTTGCAAAA     |
| AcF6'H3 | AC10A213T138.1 | gccatggctgatatcggatccATGGCTCCAAGCTTG<br>GAAGAA   | tgcggccgcaagcttgcgacTTAATTACTAACATGA<br>GCGAAATTAAGAGA |
| AcF6'H4 | AC3A54T95.1    | gccatggctgatatcggatccATGTCTCCAGCTTG<br>GAGGAA    | tgcggccgcaagcttgcgacTCATGGTCGATTAACA<br>TGAGCG         |

**Supplementary Table 16. Specific parameters of LC-MS/MS analysis for identification of enzymatic products.**

| Detection targets                                             |  |          | Column                                                              | Mobile phases                                         | Gradient programs                                                                              | Mass spectrometer type/<br>scan type/ polarity |
|---------------------------------------------------------------|--|----------|---------------------------------------------------------------------|-------------------------------------------------------|------------------------------------------------------------------------------------------------|------------------------------------------------|
| Enzymatic assays of AcCSL1                                    |  | of       | Agilent Infinity Lab Poroshell 120 EC-C18 column (1.9 μm, 2.1×50mm) | A, acetonitrile; B, water containing 0.1% acetic acid | 0 min, 95% B; 7 min, 5% B; 8-11 min, 95% B                                                     | LC-QTOF-MS/MS; Auto MS/MS mode; Negative mode  |
| Enzymatic assays of AcBAHDs with protoaescigenin substrate    |  | of being | Waters Acquity UPLC® BEH C18 column (1.7 μm, 100 × 2.1 mm)          | A, water containing 0.1% formic acid; B, acetonitrile | 0 min, 10%B<br>10-12min, 95%B;<br>13-16min, 10%B                                               | LC-QQQ-MS/MS; MS2 scan mode; Negative mode     |
| Analysis of purified 22-O-acetylprotoaescigenin               |  |          | Waters Acquity UPLC® BEH C18 column (1.7 μm, 100 × 2.1 mm)          | A, water containing 0.1% formic acid; B, acetonitrile | 0 min, 10%B<br>10-12min, 95%B;<br>13-16min, 10%B                                               | LC-QTOF-MS/MS; Auto MS/MS mode; Negative mode. |
| Enzymatic assays of AcBAHDs with desacetylescigenin substrate |  | of being | Waters Acquity UPLC® BEH C18 column (1.7 μm, 100 × 2.1 mm)          | A, water containing 0.1% formic acid; B, acetonitrile | 0-4 min, 40%B;<br>10-12 min, 100%B;<br>12.1-15 min, 40%B                                       | LC-QTOF-MS/MS; Auto MS/MS mode; Negative mode  |
| Enzymatic assays of AcF6Hs                                    |  | of       | Agilent Eclipse Plus C18 column (RRHD 1.8μm, 2.1×50mm)              | A, water containing 0.1% formic acid; B, acetonitrile | 0-2min, 5%B;<br>2-13min, 6%B;<br>13-13.1min, 95%B;<br>13.1-14.1min, 95%B;<br>14.1-14.5min, 5%B | LC-QTOF-MS/MS Auto MS/MS mode; Negative mode   |
| Enzymatic assays of AcUGTs                                    |  | of       | Agilent Eclipse Plus C18 column (RRHD 1.8μm, 2.1×50mm)              | A, acetonitrile; B, water containing 0.1% acetic acid | 0 min, 95%B;<br>5 min, 50%B;<br>6-9 min, 95%B                                                  | LC-QTOF-MS/MS Auto MS/MS mode; Positive mode   |

**Supplementary Table 17. Plasmids and strains and used in this study.**

| <b>Plasmids</b> | <b>Description</b>                                                                           | <b>Source</b> |
|-----------------|----------------------------------------------------------------------------------------------|---------------|
| pZE12-luc       | P <sub>L</sub> lacO1, <i>colE</i> ori, luc, Amp <sup>r</sup> , high copy                     | This study    |
| pCS27           | P <sub>L</sub> lacO1, P15A ori, Kan <sup>r</sup> , medium copy                               | This study    |
| pCS-TPTA-HpaBC  | pCS27, P <sub>L</sub> lacO1-TPTA and P <sub>L</sub> lacO1-HpaBC                              | 1             |
| pCS-TAL         | pCS27, RgTAL from <i>Rhodotorula glutinis</i>                                                | 2             |
| pZE-649T        | pZE12-luc, <i>AcF6'H1</i> , <i>Ac4CL2</i> , <i>AcUGT92G7</i> and <i>RgTAL</i> encoding genes | This study    |

  

| <b>Strains</b>                               | <b>Description</b>                                                                                                                                                                                         | <b>Source</b>    |
|----------------------------------------------|------------------------------------------------------------------------------------------------------------------------------------------------------------------------------------------------------------|------------------|
| DH5 $\alpha$                                 | F- $\psi$ 80dZlac $\Delta$ ( <i>ZlacYA-argF</i> ) U169 <i>endA1 recA1 hsdR17</i> (r <sub>k</sub> <sup>-</sup> , m <sub>k</sub> <sup>+</sup> )<br><i>supE44<math>\lambda</math>-thi-1 gyrA96 relA1 phoA</i> | TransGen Biotech |
| BW25113                                      | <i>rrnBT14 <math>\Delta</math>ZlacWJ16 hsdR514 <math>\Delta</math>araBADAH33 <math>\Delta</math>rhaBADLD78</i>                                                                                             | CGSC             |
| BW $\Delta$ <i>pykA</i> $\Delta$ <i>pykF</i> | BW25113 deleting genes <i>pykA</i> and <i>pykF</i>                                                                                                                                                         | This study       |
| BW1                                          | BW $\Delta$ <i>pykA</i> $\Delta$ <i>pykF</i> , pCS-TPTA-HpaBC and pZE-649T                                                                                                                                 | This study       |

### **Supplementary Table 18. Primers used in construction for heterologous expression.**

| <b>Primers</b> | <b>Sequence (5'-3')</b>                              |
|----------------|------------------------------------------------------|
| KpnI-F6H-F     | GGGAAAGGTACCCatggctccaacactcttgacaaccaattc           |
| SphI-F6H-R     | GGGAAAGCATGCTtagatcttggcgtaatcgacggtttc              |
| SphI-4cl-F     | GGGAAAGCATGCAggagatataccatggcgccacaagaacaagcagttctc  |
| NotI-4cl-R     | GGGAAAGCGGCCGCttacaatccattgctagttttgccctcagatc       |
| BamHI-RBS-92-F | GGGAAAGGATCCAggagatataccATGGCTTGCAGCAGTGATGATGAG     |
| BamHI-92-R     | GGGAAAGGATCCGCGGCCGCTTAAGTGATTGTCAGGACGTGATTG        |
| NotI-RBS-TAL-F | GGGAAAGCGGCCGCaggagatataccATGGCGCCTCGCCCGACTTCGCAAAG |
| XhoI-TAL-R     | GGGAAACTCGAGTTATGCCAGCATCTTCAGCAGAACATTGTTG          |

<sup>a</sup> Underlines denote restriction sites.

### **Supplementary references**

1. Li, X. *et al.* Establishing an artificial pathway for efficient biosynthesis of hydroxytyrosol. *ACS Synth. Biol.* **7**, 647–654 (2018).
2. Chen, Z., Sun, X., Li, Y., Yan, Y. & Yuan, Q. Metabolic engineering of *Escherichia coli* for microbial synthesis of monolignols. *Metab. Eng.* **39**, 102–109 (2017).
