# Supplementary material for: Characterization of the horse chestnut genome reveals the evolution of aescin and aesculin biosynthesis
Source: PubMed Central journal article supplement (PMC10576086; doi:10.1038/s41467-023-42253-y), 2023-10-13
Supplement: 41467_2023_42253_MOESM3_ESM.pdf [file 41467_2023_42253_MOESM3_ESM.pdf]

### **Description of Additional Supplementary Files**

File Name: Supplementary Data 1

Description: The functional annotation and GO enrichment analyses of the retained genes from the recent WGD event of *A. chinensis* genome.

File Name: Supplementary Data 2

Description: Genome wide identification and expression analysis of CYP450 gene family members in *A. chinensis* genome.

File Name: Supplementary Data 3

Description: Genome wide identification and expression analysis of BAHD gene family members in *A. chinensis* genome.

File Name: Supplementary Data 4

Description: Genome wide identification and expression analysis of UGT gene family members in *A. chinensis* genome.

File Name: Supplementary Data 5

Description: Predicted gene clusters related to triterpenoid biosynthesis in *A. chinensis* genome and their gene expression patterns in different tissues.

File Name: Supplementary Data 6

Description: The expression and annotation for the co-expression genes, which clustered into "turquoise" module of WGCNA.
